# Supplementary material for: IκBζ is a key transcriptional regulator of IL-36–driven psoriasis-related gene expression in keratinocytes
Source: PubMed Central journal article supplement — Proc Natl Acad Sci U S A. 2018 Sep 17;115(40):10088–93. doi: 10.1073/pnas.1801377115 (PMC6176600; doi:10.1073/pnas.1801377115), 2018-09-17
Supplement: pnas.1801377115.sapp.pdf [file pnas.1801377115.sapp.pdf]

Supplementary Information for

**I $\kappa$ B $\zeta$  is a key transcriptional regulator of IL-36-driven psoriasis-related gene expression in keratinocytes**

Anne Müller, Andre Hennig, Sebastian Lorscheid, Paula Grondona,  
Klaus Schulze-Osthoff, Stephan Hailfinger, Daniela Kramer

Daniela Kramer  
Email: [daniela.kramer@uni-tuebingen.de](mailto:daniela.kramer@uni-tuebingen.de)

**This PDF file includes:**

Supplementary text  
Figs. S1 to S6  
Tables S1 to S4  
References for SI reference citations

## Supplementary Information Text

### SI Materials and Methods

**Cell culture and treatment.** HaCaT cells were maintained in DMEM with 10% FCS and antibiotics. Human primary KC were freshly isolated from foreskin and maintained in CnT-07S medium with gentamycin (CELLnTEC). Recombinant human IL-36 $\alpha$  (aa 6-158), full-length IL-36 $\alpha$  (aa 1-158), IL-36 $\gamma$  (aa 18-169) or mouse human IL-36 $\alpha$  (aa 6-160) were purchased from R&D or kindly provided by Amgen. Recombinant IL-17A (11340174), TNF $\alpha$  (11343013), IFN $\gamma$  (11343536) and IL-1 $\beta$  (11340013) were from Immunotools. The following inhibitors were purchased from Selleckchem: Trametinib (MEK1/2 inhibition), SCH772984 (ERK1/2 inhibition), BMS-345541 (IKK1/2 inhibition) SP600125 (JNK inhibition), IMD0354 (IKK2 inhibition).

**Generation of knockdown cells.** Lentiviral particles were produced in HEK293T cells using the lentiviral vector pMD2.G and a second-generation packaging system (psPAX2, Addgene). HaCaT cells or primary KC were transduced in the presence of 8  $\mu$ g/mL polybrene, packaging plasmids and 5  $\mu$ g of the respective shRNA construct: pLKO.1-puro (sh ctrl); pLKO.1-TRCN0000147551 (sh NFKBIZ); pLKO.1-TRCN0000014686 (sh RELA); pLKO.1-TRCN0000008025 (sh1 MyD88); pLKO.1-TRCN0000011223 (sh2 MyD88); pLKO.1-TRCN0000020840 (sh1 STAT3); pLKO.1-TRCN0000020843 (sh2 STAT3), followed by puromycin selection (1 ng/mL, Invitrogen).

**Luciferase constructs and reporter assays.** The promoter 2 region of *NFKBIZ* (chr3: 101848459-101850067) containing the binding sites for STAT3 (CTTCCAGGAC), NF $\kappa$ B (CGGGGTTTCCC), AP1 (TGACTCC), KLF4 (TGGGCGGAGCCGGGCGGGCGGGGC) and STAT1/STAT3 (ATTTTACTGGAAATC) was cloned into a pGL3 basic construct. For deletion of transcription factor-binding sites a double PCR was performed using specific forward and reverse primers (Table S4). Successful generation of the constructs was checked by sequencing. For transfection 10<sup>5</sup> HaCaT cells were transfected with 5  $\mu$ g luciferase construct and 1.25  $\mu$ g TK-Renilla-expressing construct using Lipofectamine 3000 reagent (Life Technologies). 24 h later, cells were stimulated for 24 h with 100 ng/mL IL-36 $\alpha$  or 200 ng/mL IL-17A, before luciferase activity was measured with the Firefly Luciferase Assay Kit (Promega). Expression of the reporter constructs was calculated as fold induction over unstimulated transfected cells from data of three independent experiments.

**Western blot analysis.** Cells were washed in PBS and resuspended in lysis buffer containing 20 mM TRIS-HCl pH 7.5, 150 mM NaCl, 1% Triton X-100, 1 mM Na<sub>2</sub>EDTA, 1 mM EGTA, 1 mM  $\beta$ -glycerophosphate, 2 M urea and 1x protease inhibitor cocktail (Roche). After 10 min on ice, samples were briefly sonicated to disrupt DNA-protein complexes. Afterwards, samples were separated by SDS-PAGE and transferred to a nitrocellulose membrane. The following antibodies were used for Western blot analysis and purchased from Cell Signaling: anti-I $\kappa$ B $\zeta$  (9244), anti-p-STAT3 (phospho-STAT3 at Tyr705; 9145), anti-STAT3 (12640), anti-p65 (8242), anti-p-p65 (phospho-p65 at Ser536, 3031), anti-p-JNK (phospho-JNK at Thr183/Tyr185, 4668), anti-JNK (9252), anti-p-p44/42 MAPK (phospho-Erk1/2 at Thr202/Tyr204, 4370), anti-p44/42 MAPK (4695), anti-p-I $\kappa$ B $\alpha$  (phospho-I $\kappa$ B $\alpha$  at Ser32, 2859), anti-I $\kappa$ B $\alpha$  (4814), anti-MyD88 (4283), anti-GAPDH (2118) and anti- $\beta$ -actin (3700). Anti-HSC70 (sc-7298) was obtained from Santa Cruz Biotechnology. For detection of mouse I $\kappa$ B $\zeta$ , a self-made antibody was used.

**Chromatin immunoprecipitation.** ChIP assays were performed as described (1). After sonification, chromatin was incubated with protein G-coupled Dynabeads (Invitrogen) and 2  $\mu$ g of p65 (Diagenode, C15310256), STAT3 (Thermo Fisher, MA1-13042), RNA-polymerase II (Abcam, ab5095) or IgG control antibodies (Abcam, ab46540) overnight at 4°C. The promoter

region of *MYOD1* served as an internal negative control (forward: 5'-CTCTGCTCCTTTGCCACAAC-3', reverse: 5'-GAGTGCTCTTCGGGTTTCAG-3'). ChIP primers corresponding to the promoter region 2 of *NFKBIZ* variant 1 were self-designed (primer for readout of STAT3 ChIP: forward 5'-GCCTTAACTGGGCTAACAGC-3', reverse 5'-CTGGCAAGTCCTGGAAGGAG-3'; primer for readout p65 and Pol II ChIP: forward 5'-GAAGGGCAGGCAAACAAC-3', reverse 5'-GATGCGTCCGATTTCCAG-3'). Data are presented as the percentage of input from 2 independent experiments.

**Gene expression analysis by qPCR.** Total RNA was isolated using Qiazol (Qiagen). After digestion of genomic DNA with DNase I, cDNA synthesis was performed using M-MuLV reverse transcriptase and random hexamer primers (Thermo Fisher Scientific). Relative gene expression was quantified by real-time PCR using Maxima SYBR Green master mix (Thermo Fisher Scientific) and self-designed primers (Suppl. Table S3). PCR conditions were as follows: initial denaturation 15 min at 95°C, followed by 40 cycles of 95°C for 15 s and 60°C for 45 s. Relative mRNA levels were calculated by normalization to the reference genes *RPL37A* or *ACTB* using the  $2^{-\Delta\Delta CT}$  method.

**RNAseq.** For RNAseq analysis, libraries were constructed with the Ultra RNA Library Prep Kit at the Core Facility Genomics in Münster, Germany. Sequencing was performed using the Illumina NextSeq High Output kit. Mapping against the human reference genome hg19 was performed by HISAT2 (2). From raw gene counts, differentially expressed genes between wild-type and knockdown cells were computed using the Bioconductor R package DESeq2. Genes were called differentially expressed if their adjusted p-value (false discovery rate) was < 0.05 and the absolute fold change > 1.

**Mice.** Experiments were conducted in accordance with the German law guidelines of animal care. Tamoxifen-inducible IκBζ knockout mice were generated by crossing B6.Cg-Nfkbiz<tm1.1Muta> mice (RIKEN) to B6.129-*Gt(ROSA)26Sor<sup>tm1(cre/ERT2)Tvj</sup>*/J mice (Jackson Laboratory). IκBζ deletion was induced by intraperitoneal injection of 75 mg/kg tamoxifen (T5648, Sigma-Aldrich) for 4 consecutive days. As control, *Nfkbiz* flox/flox mice (B6.Cg-Nfkbiz<tm1.1Muta>) received tamoxifen injections in parallel. Three days after the last tamoxifen injection, mice received for 5 consecutive days intradermal injections to the ear, containing 1 μg murine IL-36α or PBS vehicle alone. At day 6, mice were sacrificed and analyzed.

**Flow cytometry.** Three ears per group were chopped and digested with 300 μg/ml Liberase (Roche) and 50 U/ml DNase I (Thermo Fisher) in 5% FCS in RPMI for 2 h at 37°C. For generation of single cell suspensions, cells were passed through a cell strainer (100 μm). After cell counting, 10<sup>5</sup> cells were treated with Fc-Block (BioRad, BUF041) and surface-stained with the following antibodies from BioLegend: anti-CD45 FITC (103107), anti-CD3 PerCP (100325), anti-CD4 PE (100407), anti-CD8 APC (100711), anti-CD11b PacificBlue (101223), anti-Ly6G PE (127607), anti-F4/80 APC (123115). Anti-γδ-TCR APC was from Thermo Fisher. Data were acquired on a LSRII flow cytometer (Becton Dickson) and gates were set based on the respective isotype controls.

**Histology.** After fixation in formaldehyde and paraffin-embedding, 5-μm sections were prepared and incubated with the following antibodies: MPO (AF3667, R&D, 1:200), F4/80 (70076, Cell Signaling, 1:400) or Ki67 (ab15580, Abcam, 1:1000). Antigen retrieval was performed in 1 mM EDTA pH 8.0 for MPO, and in 10 mM citrate pH 6.0 for F4/80 and Ki67. After incubation with peroxidase-coupled secondary antibodies, sections were stained with DAB substrate.

**Cytokine antibody array.** For detection cytokine secretion, protein lysates from 2 mouse ears per group were pooled. 600 µg total protein lysate was analyzed with a cytokine array (R&D Systems, ARY006). Mean pixel density of each spot was quantified using the dot blot analyzer (ImageJ).

**Analysis of patient data.** Gene expression data originated from GEO data set GSE13355 (3, 4). Pre-normalized gene expression values from each sample was directly taken from the GEO profile data set GDS4602. The following reporters were taken for analysis: *NFKBIZ*: ID 223218\_s\_at, *IL17A*: ID 216876\_s\_at, *IL36G*: ID 220322\_at and *LCN2*: ID 212531\_at.



**Fig. S1. Induction of I $\kappa$ B $\zeta$  protein expression by full-length and truncated IL-36 $\alpha$  as well as by IL-17A and TNF $\alpha$ .** (A) I $\kappa$ B $\zeta$  is transcriptionally induced by IL-36 $\alpha$ . HaCaT cells were pre-treated for 30 min with 100 ng/mL of active IL-36 $\alpha$  followed by the addition of 5  $\mu$ g/mL actinomycin D or a DMSO control for 30 min. *NFKB1Z* mRNA levels were analyzed by qPCR and normalized to *RPL37A*. I $\kappa$ B $\zeta$  protein levels were detected by Western blot in parallel. (B) I $\kappa$ B $\zeta$  is not induced by full-length IL-36 $\alpha$ . HaCaT cells were stimulated for 24 h with 2  $\mu$ g/mL biologically inactive full-length IL-36 $\alpha$  (aa 1-158) or 200 ng/mL truncated IL-36 $\alpha$  (aa 6-158), followed by immunoblot analysis. (C) IL-17A, alone or in combination with TNF $\alpha$ , induces I $\kappa$ B $\zeta$ . HaCaT cells were treated for the indicated times with 100 ng/mL IL-17A alone (*left*) or in combination with 10 ng/mL TNF $\alpha$  (*right*).



**Fig. S2. Mechanism of IκBζ induction by IL-17A.** In all experiments, HaCaT cells were stimulated with 200 ng/mL IL-17A. **(A)** HaCaT cells stably expressing a control shRNA (sh ctrl) or two different shRNAs targeting *MyD88* were treated for 2 h with IL-17A and analyzed by Western blotting. **(B)** Upstream signaling of IL-36α-treated primary KC. Cells were stimulated with 100 ng/mL IL-36α for the indicated time. NF-κB activation was detected by staining for the phosphorylated forms of IκBα (p-IκBα at Ser32) and p65 (p-p65 at Ser536). Activation of the MAPK pathway was detected by phosphorylated JNK (p-JNK at Thr183/ Tyr185). **(C)** Immunoblot analysis of IL-17A-treated HaCaT cells. NF-κB and STAT3 activation was detected with antibodies against the phosphorylated forms of IκBα (p-IκBα at Ser32) p65 (p-p65 at Ser536) and STAT3 (p-STAT3 at Tyr705). **(D)** HaCaT cells were either left untreated (Ctrl) or stimulated for 2 h with 100 ng/mL IL-36α together with the vehicle control DMSO, 50 nM Trametinib (MEK inhibitor), 1 μM SCH772984 (ERK1/2 inhibitor) or 10 μM SP600125 (JNK inhibitor). The status of phosphorylated ERK (p-ERK1/2) and p-JNK was measured as a control for kinase inhibition. **(E)** Gene expression and Western blot analysis of IκBζ in control and *RELA* (p65) knockdown cells after 1 h treatment with IL-17A. Knockdown efficiency was controlled by immunoblot detection of p65. *NFKB1Z* mRNA levels were normalized to *RPL37A*. **(F)** Relative mRNA and protein levels of IκBζ in control and *STAT3* knockdown HaCaT cells after 1 h of treatment with IL-17A. Knockdown efficiency of *STAT3* was controlled by immunoblot analysis. mRNA levels were normalized to *RPL37A*.



**Fig. S3. Characterization of I $\kappa$ B $\zeta$ -mediated gene expression in keratinocytes.** (A) Induction of psoriasis-related gene expression by IL-36 $\alpha$  in the presence and absence of I $\kappa$ B $\zeta$ . Biological triplicates from control and *NFKBIZ* shRNA-transduced HaCaT cells were stimulated with 100 ng/mL IL-36 $\alpha$  for the indicated times. Expression of *IL36G*, *S100A9*, *IL17C* and *CXCL5* was analyzed by qPCR and relative mRNA induction was calculated after normalization to the reference gene *RPL37A*. Significance is shown by asterisks (\* $p < 0.05$ ; \*\*  $p < 0.01$ ; \*\*\*  $p < 0.001$ ). (B) Principle component analysis (PCA) of IL-36 $\alpha$ -modulated gene expression in primary KC expressing a control or *NFKBIZ*-specific shRNA. PCA revealed only minor variances between the triplicate samples, whereas the transcripts of untreated cells or cells treated with IL-36 $\alpha$  for either 1.5 h or 24 h were strongly different. Moreover, comparison of the transcript clusters between wildtype and *NFKBIZ* knockdown cells revealed that only a specific subset of IL-36 $\alpha$ -regulated genes was affected by I $\kappa$ B $\zeta$  depletion. (C) Venn diagram showing the overlap of IL-36-regulated genes identified in our RNAseq analysis and previously published data (5). A core set of 182 IL-36 target genes defined by Mahil *et al.* (Ref. 5) was compared to our RNAseq data containing the merged sets of IL-36 target genes after 1.5 and 24 h of stimulation. Note that our data set included genes of a late (24 h) and early (1.5 h) stimulation time point which latter was not analyzed by Mahil *et al.* (2017). (D) Overlap of the IL-36 core target gene set (Ref. 5) and I $\kappa$ B $\zeta$ -dependent target genes. Examples of overlapping target genes are depicted below. (E) Western blot analysis of the I $\kappa$ B $\zeta$  knockdown in HaCaT cells expressing a control or *NFKBIZ*-specific shRNA after the indicated times of treatment with IL-36 $\alpha$  or IL-36 $\gamma$ .



**Fig. S4. Characterization of the IL-36/I $\kappa$ B $\zeta$  axis in keratinocytes.** Control and *NFKBIZ* knockdown HaCaT cells (corresponding to Fig. S3E) were treated for 2 and 24 h with 100 ng/mL IL-36 $\alpha$  (A), for 1.5 and 24 h with IL-36 $\gamma$  (B), or for 1 h with 100 ng/mL IL-1 $\beta$  (C). Expression of *IL36G*, *S100A9*, *DEFB4*, *LCN2*, *CCL20* and *CXCL5* was analyzed by qPCR and normalized to the reference gene *RPL37A*. (D) IL-36 protein levels in cytokine-stimulated HaCaT cells. Control and *NFKBIZ*-depleted HaCaT cells were stimulated for 48 h with IL-36 $\alpha$  (100 ng/mL), IL-17A (100 ng/mL) or IL-17A (100 ng/mL) + TNF $\alpha$  (10 ng/mL). 30 min before harvest cells were additionally treated with 5 mM ATP to facilitate IL-36 $\gamma$  release by P2X7 receptor-mediated exosome formation. IL-36 $\gamma$  was determined in the supernatant using an IL-36G ELISA. Significance is shown by asterisks (\* $p < 0.05$ ; \*\*  $p < 0.01$ ; \*\*\*  $p < 0.001$ ).



**Fig. S5. Further characterization of the IL-36/IKK $\zeta$  axis *in vivo*.** (A) IHC analysis of Ki67 in IL-36 $\alpha$ -treated ears as a marker for keratinocyte hyperproliferation. (B) Analysis of T-cell subpopulations in PBS and IL-36 $\alpha$ -treated ears by flow cytometry. Single cell suspensions were prepared from 3 pooled ears per group and T-cells were identified as CD45+ and CD3+ cells. For further discrimination of T-cell subpopulations cells co-stained with CD4 or CD8.  $\gamma\delta$ T-cells were identified as CD45+, CD3+ and  $\gamma\delta$ -TCR+. Error bars derive from two independent measurements (\* $p < 0.05$ ; \*\* $p < 0.01$ ; \*\*\* $p < 0.001$ ). (C) Quantification of secreted cytokines in IL-36 $\alpha$ -treated ear tissue. Pooled protein lysates of two ears from either IL-36 $\alpha$ -treated control or KO mice were analyzed using a cytokine antibody array. For both samples, equal amounts of protein were used, and equal loading controlled by analyzing reference spots on the membranes. Depicted is the mean pixel density of two dots per cytokine. Significance is shown by asterisks (\* $p < 0.05$ ; \*\* $p < 0.01$ ; \*\*\* $p < 0.001$ ; n.s. = not significant). (D) Expression data from skin biopsies of 64 healthy patients and 58 psoriasis patients were analyzed from the GEO profile data set GDS4602 (48, 49), using the GEO Dataset Analysis Tool (GDS browser from NCBI). Shown is the mean normalized expression of *NFKBIZ* (ID: 223218\_s\_at), *IL17A* (ID: 216876\_s\_at) and *IL36G* (ID: 220322\_at) in normal skin (NN) of healthy individuals as well as in uninvolved skin (PN) and psoriatic lesions (PP) from psoriasis patients. (E) Normalized expression values from *LCN2* (ID: 212531\_at) were plotted against *NFKBIZ*, *IL36G* and *IL17A*.



**Fig. S6. Simplified model of IL-36-driven IκBζ signaling in keratinocytes.** Binding of IL-36 to its receptor triggers the expression of the transcriptional regulator IκBζ, which then transcriptionally upregulates several antimicrobial peptides, cytokines and chemokines involved in the pathogenesis of psoriasis. Among others, induction of IκBζ target genes results in the recruitment and activation of immune cells. Important IκBζ target genes are also IL-17 and IL-36 itself, triggering an amplification loop of proinflammatory IκBζ signaling in keratinocytes.

**Table S1. List of genes regulated by *NFKBIZ* knockdown in primary KC after 1.5 h of IL-36 $\alpha$  treatment**

|                 | <b>Base Mean</b> | <b>log2 fold Change</b> | <b>lfcSE</b> | <b>stat</b> | <b>P value</b> | <b>P value adj.</b> |
|-----------------|------------------|-------------------------|--------------|-------------|----------------|---------------------|
| <b>NTSR1</b>    | 36.69            | 3.57                    | 0.47         | -7.63       | 2.26554E-14    | 2.80042E-11         |
| <b>RMRP</b>     | 15.62            | 2.55                    | 0.67         | -3.82       | 0.00013082     | 0.003760604         |
| <b>DOK7</b>     | 236.97           | 2.43                    | 0.35         | -6.87       | 6.54443E-12    | 4.04476E-09         |
| <b>UBBP4</b>    | 13.30            | 2.35                    | 0.60         | -3.95       | 7.91843E-05    | 0.002581941         |
| <b>MATK</b>     | 19.32            | 2.32                    | 0.51         | -4.59       | 4.3557E-06     | 0.000297611         |
| <b>RAMP1</b>    | 206.36           | 2.26                    | 0.35         | -6.50       | 7.95432E-11    | 3.37984E-08         |
| <b>DUSP9</b>    | 53.29            | 2.23                    | 0.41         | -5.43       | 5.74436E-08    | 9.29835E-06         |
| <b>SYT12</b>    | 117.45           | 2.20                    | 0.41         | -5.34       | 9.2756E-08     | 1.33006E-05         |
| <b>ASCL2</b>    | 32.82            | 2.18                    | 0.47         | -4.65       | 3.37294E-06    | 0.000240115         |
| <b>CRLF1</b>    | 58.59            | 2.11                    | 0.38         | -5.49       | 4.07773E-08    | 7.20064E-06         |
| <b>SPRY4</b>    | 642.68           | 2.09                    | 0.22         | -9.50       | 2.00174E-21    | 9.07253E-18         |
| <b>LYNX1</b>    | 189.12           | 2.04                    | 0.40         | -5.12       | 2.99845E-07    | 3.2616E-05          |
| <b>DUSP2</b>    | 409.28           | 2.02                    | 0.35         | -5.85       | 4.97137E-09    | 1.16544E-06         |
| <b>USH1G</b>    | 13.45            | 2.02                    | 0.62         | -3.24       | 0.001212883    | 0.016508214         |
| <b>KIAA1644</b> | 25.47            | 2.01                    | 0.45         | -4.49       | 7.10439E-06    | 0.000429326         |
| <b>DEGS2</b>    | 46.57            | 1.99                    | 0.46         | -4.35       | 1.38739E-05    | 0.00072277          |
| <b>PTGES</b>    | 125.49           | 1.97                    | 0.34         | -5.76       | 8.25718E-09    | 1.78211E-06         |
| <b>TMEM105</b>  | 20.05            | 1.93                    | 0.46         | -4.17       | 3.09087E-05    | 0.001334178         |
| <b>CX3CL1</b>   | 33.79            | 1.93                    | 0.47         | -4.10       | 4.14642E-05    | 0.001713643         |
| <b>SNCB</b>     | 58.08            | 1.91                    | 0.42         | -4.55       | 5.39648E-06    | 0.000342878         |
| <b>HAS1</b>     | 18.97            | 1.90                    | 0.48         | -3.95       | 7.95946E-05    | 0.002589111         |
| <b>CPLX1</b>    | 21.35            | 1.90                    | 0.48         | -3.99       | 6.55802E-05    | 0.002306451         |
| <b>STMN3</b>    | 122.69           | 1.89                    | 0.37         | -5.17       | 2.33847E-07    | 2.64968E-05         |
| <b>KRT1</b>     | 188.81           | 1.88                    | 0.29         | -6.61       | 3.85818E-11    | 1.69225E-08         |
| <b>DNLZ</b>     | 22.01            | 1.87                    | 0.59         | -3.18       | 0.001486806    | 0.018753345         |
| <b>GRIA1</b>    | 19.04            | 1.87                    | 0.50         | -3.73       | 0.000189181    | 0.004844251         |
| <b>LRFN1</b>    | 90.52            | 1.85                    | 0.38         | -4.91       | 8.97741E-07    | 7.71716E-05         |
| <b>CITED4</b>   | 2028.14          | 1.84                    | 0.30         | -6.06       | 1.36946E-09    | 4.43346E-07         |
| <b>FOXL1</b>    | 13.71            | 1.83                    | 0.54         | -3.40       | 0.000679254    | 0.011530356         |
| <b>PLLP</b>     | 142.79           | 1.79                    | 0.26         | -6.85       | 7.49452E-12    | 4.43057E-09         |
| <b>PALD1</b>    | 34.37            | 1.78                    | 0.40         | -4.50       | 6.93618E-06    | 0.00042382          |
| <b>CAPN8</b>    | 90.37            | 1.75                    | 0.32         | -5.44       | 5.40551E-08    | 8.96571E-06         |
| <b>GPR153</b>   | 2211.19          | 1.75                    | 0.33         | -5.33       | 9.87708E-08    | 1.39894E-05         |
| <b>SYT8</b>     | 300.56           | 1.75                    | 0.30         | -5.87       | 4.30154E-09    | 1.05144E-06         |
| <b>DCN</b>      | 19.76            | 1.74                    | 0.45         | -3.85       | 0.000117377    | 0.003492291         |
| <b>ENTPD2</b>   | 328.87           | 1.74                    | 0.32         | -5.53       | 3.21671E-08    | 5.91049E-06         |

|                       |         |      |      |       |             |             |
|-----------------------|---------|------|------|-------|-------------|-------------|
| <b>SLC22A17</b>       | 329.90  | 1.74 | 0.30 | -5.75 | 9.08664E-09 | 1.9288E-06  |
| <b>PTGS1</b>          | 202.11  | 1.72 | 0.26 | -6.65 | 2.97177E-11 | 1.49656E-08 |
| <b>EDN2</b>           | 26.70   | 1.71 | 0.38 | -4.49 | 7.17739E-06 | 0.000431819 |
| <b>EGFL7</b>          | 324.81  | 1.70 | 0.42 | -4.08 | 4.41959E-05 | 0.001793826 |
| <b>TNFRSF18</b>       | 311.45  | 1.69 | 0.32 | -5.34 | 9.2929E-08  | 1.33006E-05 |
| <b>SH3TC1</b>         | 1053.00 | 1.69 | 0.36 | -4.65 | 3.3605E-06  | 0.000240115 |
| <b>RP11-1055B8.6</b>  | 15.98   | 1.67 | 0.54 | -3.11 | 0.001858448 | 0.021601366 |
| <b>TP73</b>           | 23.76   | 1.67 | 0.46 | -3.61 | 0.000304315 | 0.006739047 |
| <b>MROH6</b>          | 3512.63 | 1.66 | 0.33 | -5.10 | 3.34272E-07 | 3.55086E-05 |
| <b>BGN</b>            | 16.86   | 1.66 | 0.53 | -3.11 | 0.001880921 | 0.021784395 |
| <b>SLC19A1</b>        | 1829.84 | 1.66 | 0.37 | -4.48 | 7.57219E-06 | 0.00044571  |
| <b>TH</b>             | 116.02  | 1.65 | 0.33 | -4.98 | 6.23379E-07 | 5.6133E-05  |
| <b>KLK14</b>          | 51.87   | 1.65 | 0.39 | -4.20 | 2.65412E-05 | 0.001191025 |
| <b>RP11-1275H24.1</b> | 55.10   | 1.63 | 0.42 | -3.93 | 8.55968E-05 | 0.002747145 |
| <b>PTPRU</b>          | 2427.25 | 1.63 | 0.32 | -5.07 | 3.90059E-07 | 4.05098E-05 |
| <b>NAPRT1</b>         | 1086.21 | 1.63 | 0.31 | -5.24 | 1.57862E-07 | 2.00602E-05 |
| <b>CDT1</b>           | 2468.96 | 1.62 | 0.32 | -4.99 | 5.94145E-07 | 5.53328E-05 |
| <b>CPNE5</b>          | 32.61   | 1.62 | 0.36 | -4.55 | 5.3036E-06  | 0.000338559 |
| <b>ABCA2</b>          | 528.66  | 1.62 | 0.34 | -4.77 | 1.85847E-06 | 0.000144398 |
| <b>NUDT8</b>          | 189.96  | 1.62 | 0.42 | -3.89 | 0.000102143 | 0.003156451 |
| <b>GDNF</b>           | 35.28   | 1.61 | 0.34 | -4.76 | 1.94597E-06 | 0.000150337 |
| <b>FAM132A</b>        | 82.35   | 1.61 | 0.40 | -3.99 | 6.57703E-05 | 0.002306451 |
| <b>FGFR4</b>          | 330.38  | 1.61 | 0.35 | -4.55 | 5.48997E-06 | 0.000345589 |
| <b>LINC00173</b>      | 14.42   | 1.61 | 0.59 | -2.73 | 0.00640307  | 0.046458131 |
| <b>COL5A3</b>         | 97.34   | 1.59 | 0.35 | -4.55 | 5.47311E-06 | 0.000345589 |
| <b>PLK1</b>           | 2492.76 | 1.59 | 0.27 | -5.84 | 5.31008E-09 | 1.22375E-06 |
| <b>OLFM2</b>          | 237.37  | 1.58 | 0.33 | -4.84 | 1.27851E-06 | 0.000105357 |
| <b>EEF1A2</b>         | 31.73   | 1.58 | 0.38 | -4.21 | 2.55856E-05 | 0.001159625 |
| <b>RP11-770E5.1</b>   | 17.62   | 1.58 | 0.46 | -3.44 | 0.000578136 | 0.010235564 |
| <b>KCNK5</b>          | 128.56  | 1.57 | 0.28 | -5.64 | 1.73734E-08 | 3.32713E-06 |
| <b>TONSL</b>          | 1878.45 | 1.57 | 0.34 | -4.58 | 4.57553E-06 | 0.000303651 |
| <b>WNT7B</b>          | 1240.12 | 1.55 | 0.32 | -4.90 | 9.73165E-07 | 8.27008E-05 |
| <b>GJC2</b>           | 76.42   | 1.55 | 0.42 | -3.67 | 0.000239484 | 0.005702741 |
| <b>CTD-2555C10.3</b>  | 51.20   | 1.54 | 0.41 | -3.76 | 0.000172436 | 0.004535047 |
| <b>GAREML</b>         | 77.41   | 1.54 | 0.30 | -5.04 | 4.63403E-07 | 4.47349E-05 |
| <b>SLC52A3</b>        | 439.00  | 1.53 | 0.26 | -5.88 | 4.1459E-09  | 1.04392E-06 |
| <b>HPDL</b>           | 120.37  | 1.53 | 0.29 | -5.36 | 8.16353E-08 | 1.21613E-05 |
| <b>AC018638.1</b>     | 21.57   | 1.52 | 0.50 | -3.07 | 0.002158634 | 0.023670122 |
| <b>C15orf39</b>       | 3127.90 | 1.52 | 0.35 | -4.37 | 1.2356E-05  | 0.000666683 |
| <b>TMEM121</b>        | 33.87   | 1.51 | 0.48 | -3.15 | 0.001652997 | 0.02019389  |
| <b>PROB1</b>          | 480.44  | 1.51 | 0.33 | -4.58 | 4.60044E-06 | 0.000303651 |

|                    |          |      |      |       |             |             |
|--------------------|----------|------|------|-------|-------------|-------------|
| <b>PRRT4</b>       | 127.54   | 1.50 | 0.36 | -4.12 | 3.71906E-05 | 0.001565573 |
| <b>NPAS1</b>       | 54.44    | 1.50 | 0.41 | -3.63 | 0.000286895 | 0.006501514 |
| <b>GPAA1</b>       | 6340.25  | 1.50 | 0.35 | -4.24 | 2.26669E-05 | 0.001059113 |
| <b>PROM2</b>       | 2941.51  | 1.50 | 0.32 | -4.65 | 3.28821E-06 | 0.00023656  |
| <b>C1orf145</b>    | 18.13    | 1.50 | 0.47 | -3.18 | 0.001457413 | 0.018554718 |
| <b>PLEKHA7</b>     | 188.14   | 1.49 | 0.22 | -6.77 | 1.31768E-11 | 7.16657E-09 |
| <b>LPHN1</b>       | 126.92   | 1.49 | 0.37 | -4.07 | 4.75998E-05 | 0.001878553 |
| <b>KCNMA1</b>      | 121.21   | 1.49 | 0.27 | -5.47 | 4.59965E-08 | 7.81768E-06 |
| <b>LINC00162</b>   | 35.08    | 1.48 | 0.40 | -3.69 | 0.000226536 | 0.005475789 |
| <b>CTB-102L5.4</b> | 34.47    | 1.47 | 0.47 | -3.15 | 0.00160817  | 0.019842369 |
| <b>IRF2BPL</b>     | 1128.35  | 1.47 | 0.29 | -5.01 | 5.44604E-07 | 5.14235E-05 |
| <b>SLC16A3</b>     | 3228.38  | 1.47 | 0.36 | -4.08 | 4.50465E-05 | 0.001817499 |
| <b>FASN</b>        | 96217.62 | 1.47 | 0.36 | -4.04 | 5.42499E-05 | 0.002046291 |
| <b>IGFBP2</b>      | 5259.48  | 1.46 | 0.34 | -4.37 | 1.22969E-05 | 0.000666137 |
| <b>CBX2</b>        | 339.33   | 1.46 | 0.34 | -4.31 | 1.63281E-05 | 0.000816227 |
| <b>TAS1R3</b>      | 76.91    | 1.46 | 0.36 | -4.10 | 4.04412E-05 | 0.001681587 |
| <b>AC079250.1</b>  | 42.29    | 1.45 | 0.39 | -3.73 | 0.000188518 | 0.004839375 |
| <b>KIF18B</b>      | 1034.89  | 1.45 | 0.24 | -5.97 | 2.4432E-09  | 6.92087E-07 |
| <b>GALK1</b>       | 231.14   | 1.45 | 0.38 | -3.85 | 0.00012019  | 0.003544967 |
| <b>CDC42BPG</b>    | 2591.47  | 1.45 | 0.34 | -4.25 | 2.10619E-05 | 0.000997833 |
| <b>FURIN</b>       | 11269.18 | 1.44 | 0.34 | -4.28 | 1.8625E-05  | 0.000904443 |
| <b>LRP3</b>        | 1688.33  | 1.44 | 0.36 | -4.01 | 6.11098E-05 | 0.00222205  |
| <b>MFSD3</b>       | 1337.78  | 1.44 | 0.32 | -4.48 | 7.30959E-06 | 0.000437835 |
| <b>FLJ27365</b>    | 1882.10  | 1.43 | 0.33 | -4.34 | 1.40193E-05 | 0.000727079 |
| <b>SH2D2A</b>      | 301.43   | 1.43 | 0.31 | -4.60 | 4.24967E-06 | 0.000293314 |
| <b>TMEM201</b>     | 1333.13  | 1.43 | 0.37 | -3.86 | 0.00011361  | 0.003402546 |
| <b>GAS2L1</b>      | 3357.03  | 1.42 | 0.35 | -4.09 | 4.34396E-05 | 0.00176841  |
| <b>AMN</b>         | 57.17    | 1.42 | 0.40 | -3.57 | 0.000358417 | 0.0076028   |
| <b>SLC39A4</b>     | 1011.15  | 1.42 | 0.37 | -3.83 | 0.000126202 | 0.003666611 |
| <b>ZNHIT2</b>      | 408.48   | 1.42 | 0.36 | -3.96 | 7.554E-05   | 0.002503256 |
| <b>AQP3</b>        | 2941.08  | 1.42 | 0.32 | -4.45 | 8.41513E-06 | 0.000486896 |
| <b>MMP9</b>        | 284.79   | 1.41 | 0.32 | -4.41 | 1.05104E-05 | 0.000585699 |
| <b>EFR3B</b>       | 61.07    | 1.41 | 0.29 | -4.80 | 1.57838E-06 | 0.000124861 |
| <b>N4BP3</b>       | 1574.65  | 1.41 | 0.29 | -4.82 | 1.43298E-06 | 0.000115291 |
| <b>ICAM1</b>       | 1169.32  | 1.41 | 0.26 | -5.48 | 4.19055E-08 | 7.30499E-06 |
| <b>RECQL4</b>      | 1722.72  | 1.41 | 0.31 | -4.58 | 4.58649E-06 | 0.000303651 |
| <b>GCHFR</b>       | 113.17   | 1.41 | 0.37 | -3.84 | 0.000121533 | 0.003553739 |
| <b>C3</b>          | 64.73    | 1.41 | 0.28 | -5.04 | 4.63898E-07 | 4.47349E-05 |
| <b>COL18A1</b>     | 3120.75  | 1.40 | 0.33 | -4.22 | 2.47191E-05 | 0.001127872 |
| <b>TNNI2</b>       | 23.89    | 1.40 | 0.42 | -3.34 | 0.000826532 | 0.013144283 |
| <b>ARHGAP4</b>     | 37.37    | 1.40 | 0.40 | -3.51 | 0.000452464 | 0.008864767 |

|                      |          |      |      |       |             |             |
|----------------------|----------|------|------|-------|-------------|-------------|
| <b>TELO2</b>         | 4341.95  | 1.40 | 0.33 | -4.19 | 2.78231E-05 | 0.001224305 |
| <b>TROAP</b>         | 553.42   | 1.40 | 0.26 | -5.36 | 8.38118E-08 | 1.22536E-05 |
| <b>MDFI</b>          | 6269.58  | 1.40 | 0.32 | -4.34 | 1.41705E-05 | 0.000727079 |
| <b>C17orf70</b>      | 2465.73  | 1.40 | 0.35 | -4.00 | 6.23973E-05 | 0.002238565 |
| <b>ADRA1B</b>        | 117.18   | 1.39 | 0.24 | -5.89 | 3.86772E-09 | 9.92253E-07 |
| <b>NOTCH3</b>        | 2944.00  | 1.39 | 0.34 | -4.05 | 5.10446E-05 | 0.001971743 |
| <b>PRR12</b>         | 2128.98  | 1.39 | 0.35 | -3.97 | 7.18753E-05 | 0.00244527  |
| <b>RP11-509E16.1</b> | 36.54    | 1.39 | 0.42 | -3.34 | 0.000846042 | 0.01332845  |
| <b>PDGFB</b>         | 117.64   | 1.39 | 0.30 | -4.67 | 2.95589E-06 | 0.000216703 |
| <b>BCAM</b>          | 5055.45  | 1.39 | 0.35 | -3.96 | 7.43063E-05 | 0.002488529 |
| <b>RP11-328M4.2</b>  | 24.40    | 1.39 | 0.37 | -3.73 | 0.000194687 | 0.00492037  |
| <b>MIDN</b>          | 3529.69  | 1.39 | 0.32 | -4.33 | 1.51615E-05 | 0.000763523 |
| <b>SLCO4A1</b>       | 744.48   | 1.38 | 0.27 | -5.04 | 4.56923E-07 | 4.47349E-05 |
| <b>PKMYT1</b>        | 6033.67  | 1.38 | 0.33 | -4.13 | 3.55551E-05 | 0.00151076  |
| <b>FBXL16</b>        | 91.25    | 1.38 | 0.32 | -4.26 | 2.03352E-05 | 0.000970165 |
| <b>C1orf233</b>      | 756.41   | 1.38 | 0.36 | -3.81 | 0.000137218 | 0.00387086  |
| <b>RAVER1</b>        | 2235.36  | 1.37 | 0.37 | -3.67 | 0.000243298 | 0.005783442 |
| <b>RABL6</b>         | 5465.28  | 1.37 | 0.32 | -4.28 | 1.82986E-05 | 0.000894986 |
| <b>HPCAL1</b>        | 1749.61  | 1.37 | 0.30 | -4.52 | 6.15698E-06 | 0.00038402  |
| <b>NME3</b>          | 779.59   | 1.37 | 0.36 | -3.85 | 0.000119222 | 0.003524046 |
| <b>KCNH3</b>         | 57.12    | 1.37 | 0.37 | -3.66 | 0.000249712 | 0.005894669 |
| <b>DNASE1L2</b>      | 101.76   | 1.37 | 0.33 | -4.08 | 4.46195E-05 | 0.00180563  |
| <b>FUOM</b>          | 535.34   | 1.37 | 0.35 | -3.87 | 0.000110039 | 0.003324876 |
| <b>LINC01023</b>     | 13.90    | 1.37 | 0.49 | -2.76 | 0.005752889 | 0.04355347  |
| <b>E2F2</b>          | 110.11   | 1.36 | 0.35 | -3.92 | 8.68174E-05 | 0.002777543 |
| <b>FGFRL1</b>        | 919.77   | 1.35 | 0.31 | -4.30 | 1.69464E-05 | 0.000844028 |
| <b>GAMT</b>          | 179.20   | 1.35 | 0.38 | -3.52 | 0.000435231 | 0.008713117 |
| <b>WTIP</b>          | 959.53   | 1.35 | 0.32 | -4.24 | 2.26612E-05 | 0.001059113 |
| <b>GCAT</b>          | 389.12   | 1.35 | 0.36 | -3.74 | 0.000182912 | 0.004755364 |
| <b>PDLIM2</b>        | 2653.01  | 1.35 | 0.33 | -4.06 | 4.94549E-05 | 0.001937864 |
| <b>C16orf59</b>      | 629.54   | 1.35 | 0.34 | -3.90 | 9.58857E-05 | 0.002990272 |
| <b>RPS6KA4</b>       | 9670.96  | 1.34 | 0.35 | -3.87 | 0.000108537 | 0.003308931 |
| <b>FAM203A</b>       | 61.21    | 1.34 | 0.35 | -3.79 | 0.000149382 | 0.004095066 |
| <b>C20orf195</b>     | 25.04    | 1.34 | 0.47 | -2.88 | 0.003981263 | 0.034283237 |
| <b>RP11-94H18.1</b>  | 18.24    | 1.34 | 0.43 | -3.12 | 0.001833697 | 0.021530899 |
| <b>TGM3</b>          | 14.91    | 1.33 | 0.49 | -2.75 | 0.005951514 | 0.044406436 |
| <b>PIDD</b>          | 958.54   | 1.33 | 0.35 | -3.77 | 0.000162192 | 0.004341182 |
| <b>IGSF9B</b>        | 119.71   | 1.32 | 0.33 | -4.02 | 5.83159E-05 | 0.002148837 |
| <b>KRT24</b>         | 13.48    | 1.32 | 0.48 | -2.77 | 0.005597304 | 0.042780518 |
| <b>WDR18</b>         | 3831.34  | 1.32 | 0.35 | -3.79 | 0.000152259 | 0.004140542 |
| <b>AGRN</b>          | 39952.14 | 1.32 | 0.36 | -3.69 | 0.00022466  | 0.005454828 |

|                |           |      |      |       |             |             |
|----------------|-----------|------|------|-------|-------------|-------------|
| <b>RTEL1</b>   | 57.36     | 1.32 | 0.36 | -3.63 | 0.000285977 | 0.006491527 |
| <b>SCRN2</b>   | 526.82    | 1.32 | 0.30 | -4.39 | 1.13603E-05 | 0.000617863 |
| <b>DIRAS1</b>  | 25.22     | 1.31 | 0.47 | -2.78 | 0.005478644 | 0.042293811 |
| <b>PYCRL</b>   | 1028.07   | 1.31 | 0.35 | -3.70 | 0.000211958 | 0.005259106 |
| <b>ADAM8</b>   | 9775.55   | 1.31 | 0.31 | -4.28 | 1.90483E-05 | 0.000915193 |
| <b>GPX1</b>    | 9013.76   | 1.31 | 0.35 | -3.73 | 0.000190361 | 0.004847066 |
| <b>LFNG</b>    | 1803.78   | 1.30 | 0.33 | -3.93 | 8.41492E-05 | 0.00271132  |
| <b>LAMA5</b>   | 11199.37  | 1.30 | 0.36 | -3.57 | 0.000357171 | 0.007588206 |
| <b>GPSM1</b>   | 2890.20   | 1.30 | 0.35 | -3.70 | 0.000219024 | 0.0053532   |
| <b>PIM3</b>    | 7092.94   | 1.30 | 0.32 | -4.06 | 4.89632E-05 | 0.001924139 |
| <b>CD320</b>   | 1093.13   | 1.30 | 0.36 | -3.59 | 0.000335898 | 0.007284227 |
| <b>KCNAB2</b>  | 146.70    | 1.30 | 0.31 | -4.24 | 2.28352E-05 | 0.001063321 |
| <b>POLD1</b>   | 3651.02   | 1.30 | 0.32 | -4.03 | 5.64893E-05 | 0.002110122 |
| <b>CENPM</b>   | 436.70    | 1.30 | 0.35 | -3.75 | 0.000179517 | 0.004694911 |
| <b>FCRLB</b>   | 26.12     | 1.30 | 0.47 | -2.77 | 0.005596439 | 0.042780518 |
| <b>RNF26</b>   | 2097.26   | 1.30 | 0.36 | -3.56 | 0.000375498 | 0.007854851 |
| <b>H2AFX</b>   | 5018.73   | 1.29 | 0.32 | -4.08 | 4.59253E-05 | 0.001827923 |
| <b>CAPN15</b>  | 2199.98   | 1.29 | 0.33 | -3.88 | 0.000102903 | 0.003172729 |
| <b>FSCN1</b>   | 34967.91  | 1.28 | 0.34 | -3.75 | 0.000174741 | 0.00458678  |
| <b>HR</b>      | 3930.76   | 1.28 | 0.34 | -3.76 | 0.000172075 | 0.004534317 |
| <b>TMEM238</b> | 210.07    | 1.28 | 0.34 | -3.78 | 0.000154824 | 0.004193518 |
| <b>INTS1</b>   | 11915.94  | 1.28 | 0.35 | -3.64 | 0.000272527 | 0.006306864 |
| <b>PFAS</b>    | 2113.70   | 1.28 | 0.28 | -4.48 | 7.54242E-06 | 0.00044571  |
| <b>MIR3648</b> | 40.25     | 1.28 | 0.46 | -2.76 | 0.005848651 | 0.044016309 |
| <b>SLC4A2</b>  | 5966.52   | 1.27 | 0.36 | -3.58 | 0.00034312  | 0.007393672 |
| <b>ISYNA1</b>  | 338.21    | 1.27 | 0.33 | -3.81 | 0.000139766 | 0.003926455 |
| <b>WDR90</b>   | 2511.18   | 1.27 | 0.31 | -4.15 | 3.38966E-05 | 0.001453919 |
| <b>STX1A</b>   | 188.68    | 1.27 | 0.28 | -4.52 | 6.19671E-06 | 0.000384733 |
| <b>REEP4</b>   | 3088.80   | 1.27 | 0.33 | -3.83 | 0.000128168 | 0.003707862 |
| <b>KREMEN2</b> | 437.56    | 1.27 | 0.32 | -3.95 | 7.85505E-05 | 0.002578656 |
| <b>GDPD2</b>   | 24.43     | 1.27 | 0.41 | -3.10 | 0.001937903 | 0.022142576 |
| <b>IMPA2</b>   | 1886.85   | 1.27 | 0.24 | -5.38 | 7.60731E-08 | 1.16221E-05 |
| <b>UNC93B1</b> | 1011.28   | 1.27 | 0.32 | -3.92 | 8.99804E-05 | 0.002845264 |
| <b>PLXNB2</b>  | 14746.49  | 1.27 | 0.31 | -4.02 | 5.7754E-05  | 0.002137774 |
| <b>PAK6</b>    | 243.65    | 1.27 | 0.35 | -3.58 | 0.000347505 | 0.007452949 |
| <b>NFKBID</b>  | 1982.99   | 1.27 | 0.32 | -4.00 | 6.46196E-05 | 0.002288107 |
| <b>TSKU</b>    | 3249.79   | 1.26 | 0.32 | -3.94 | 8.13311E-05 | 0.002632998 |
| <b>FHOD1</b>   | 1461.24   | 1.26 | 0.30 | -4.19 | 2.80027E-05 | 0.001228236 |
| <b>PLEC</b>    | 143550.89 | 1.26 | 0.35 | -3.62 | 0.000294712 | 0.00661254  |
| <b>MMP17</b>   | 908.43    | 1.26 | 0.35 | -3.63 | 0.000285812 | 0.006491527 |
| <b>TTLL12</b>  | 9007.03   | 1.26 | 0.33 | -3.80 | 0.000142379 | 0.003975199 |

|                     |          |      |      |       |             |             |
|---------------------|----------|------|------|-------|-------------|-------------|
| <b>RIN1</b>         | 1375.33  | 1.25 | 0.36 | -3.45 | 0.000561586 | 0.010034017 |
| <b>SRM</b>          | 8146.16  | 1.25 | 0.34 | -3.74 | 0.000187584 | 0.00483913  |
| <b>LINC00472</b>    | 20.42    | 1.25 | 0.46 | -2.74 | 0.006079827 | 0.044976826 |
| <b>NUDT16L1</b>     | 914.77   | 1.25 | 0.34 | -3.65 | 0.000266995 | 0.006226993 |
| <b>MTSS1L</b>       | 694.87   | 1.25 | 0.35 | -3.58 | 0.000345473 | 0.007432585 |
| <b>DCAF15</b>       | 1693.72  | 1.25 | 0.30 | -4.22 | 2.40036E-05 | 0.001101457 |
| <b>SLC6A17</b>      | 46.59    | 1.25 | 0.40 | -3.08 | 0.002082431 | 0.023170877 |
| <b>NRGN</b>         | 57.27    | 1.25 | 0.39 | -3.22 | 0.001275995 | 0.017089493 |
| <b>MESP2</b>        | 23.54    | 1.24 | 0.46 | -2.70 | 0.006926515 | 0.048496306 |
| <b>TMEM158</b>      | 130.00   | 1.24 | 0.32 | -3.84 | 0.00012125  | 0.003553124 |
| <b>FOSL1</b>        | 13941.72 | 1.24 | 0.27 | -4.56 | 5.06496E-06 | 0.000327944 |
| <b>RELT</b>         | 1312.93  | 1.24 | 0.31 | -4.04 | 5.43148E-05 | 0.002046291 |
| <b>GNB1L</b>        | 461.38   | 1.24 | 0.35 | -3.56 | 0.00037404  | 0.007836401 |
| <b>MBLAC1</b>       | 43.77    | 1.24 | 0.33 | -3.80 | 0.000143291 | 0.003992463 |
| <b>C14orf80</b>     | 1321.43  | 1.24 | 0.34 | -3.63 | 0.000279434 | 0.006407181 |
| <b>PIGQ</b>         | 2932.88  | 1.24 | 0.37 | -3.39 | 0.000710157 | 0.011906298 |
| <b>CRISPLD2</b>     | 128.30   | 1.24 | 0.24 | -5.05 | 4.38716E-07 | 4.41868E-05 |
| <b>GPR3</b>         | 45.08    | 1.23 | 0.33 | -3.71 | 0.000203529 | 0.00509647  |
| <b>SLC5A5</b>       | 20.84    | 1.23 | 0.43 | -2.88 | 0.003916143 | 0.034098918 |
| <b>PRSS21</b>       | 142.03   | 1.23 | 0.30 | -4.17 | 3.08373E-05 | 0.001334178 |
| <b>ASPG</b>         | 51.03    | 1.23 | 0.36 | -3.45 | 0.000564166 | 0.010053696 |
| <b>FBXW5</b>        | 5827.71  | 1.23 | 0.35 | -3.49 | 0.000477305 | 0.009080612 |
| <b>C2</b>           | 25.58    | 1.23 | 0.40 | -3.05 | 0.002256431 | 0.024234356 |
| <b>NPR1</b>         | 328.31   | 1.23 | 0.25 | -4.91 | 9.02426E-07 | 7.71716E-05 |
| <b>SLC16A5</b>      | 441.87   | 1.23 | 0.31 | -3.97 | 7.22645E-05 | 0.002450326 |
| <b>EPN1</b>         | 9428.18  | 1.23 | 0.36 | -3.44 | 0.000586778 | 0.010348154 |
| <b>WNT10A</b>       | 788.66   | 1.22 | 0.26 | -4.69 | 2.75261E-06 | 0.00020452  |
| <b>EMR2</b>         | 302.05   | 1.22 | 0.18 | -6.64 | 3.22297E-11 | 1.51113E-08 |
| <b>PIF1</b>         | 243.31   | 1.22 | 0.20 | -5.99 | 2.05776E-09 | 6.21762E-07 |
| <b>C9orf142</b>     | 947.16   | 1.22 | 0.33 | -3.71 | 0.000208862 | 0.005191762 |
| <b>RARG</b>         | 3752.50  | 1.22 | 0.31 | -3.95 | 7.86443E-05 | 0.002578656 |
| <b>INF2</b>         | 9094.24  | 1.22 | 0.34 | -3.64 | 0.000273574 | 0.006315419 |
| <b>SPRY2</b>        | 343.56   | 1.22 | 0.17 | -7.09 | 1.3528E-12  | 1.02189E-09 |
| <b>FAM110A</b>      | 790.49   | 1.22 | 0.30 | -4.02 | 5.85485E-05 | 0.002151577 |
| <b>RP11-21L23.2</b> | 41.27    | 1.22 | 0.31 | -3.88 | 0.00010579  | 0.003247022 |
| <b>MFSD2B</b>       | 325.29   | 1.22 | 0.38 | -3.21 | 0.001345697 | 0.017625853 |
| <b>MPND</b>         | 178.40   | 1.22 | 0.35 | -3.44 | 0.000584384 | 0.010319309 |
| <b>KLHDC7B</b>      | 24.69    | 1.21 | 0.45 | -2.72 | 0.006493208 | 0.046862077 |
| <b>CTXN1</b>        | 284.01   | 1.21 | 0.37 | -3.24 | 0.0011925   | 0.01641136  |
| <b>SAPCD2</b>       | 236.09   | 1.21 | 0.34 | -3.52 | 0.000428185 | 0.008612481 |
| <b>TMEM180</b>      | 295.65   | 1.21 | 0.33 | -3.63 | 0.00028259  | 0.006446932 |

|                    |          |      |      |       |             |             |
|--------------------|----------|------|------|-------|-------------|-------------|
| <b>CENPB</b>       | 5729.18  | 1.21 | 0.34 | -3.56 | 0.000373778 | 0.007836401 |
| <b>CCNF</b>        | 369.90   | 1.21 | 0.27 | -4.47 | 7.91325E-06 | 0.000461787 |
| <b>PLXNA1</b>      | 11975.75 | 1.21 | 0.31 | -3.92 | 8.89154E-05 | 0.002818143 |
| <b>CHTF18</b>      | 2776.72  | 1.21 | 0.32 | -3.79 | 0.000151102 | 0.004126072 |
| <b>SLC6A8</b>      | 3677.92  | 1.21 | 0.34 | -3.52 | 0.000439203 | 0.008718017 |
| <b>DLX3</b>        | 218.33   | 1.21 | 0.28 | -4.31 | 1.61137E-05 | 0.000808482 |
| <b>SYTL1</b>       | 1975.77  | 1.21 | 0.30 | -4.01 | 6.02155E-05 | 0.002206872 |
| <b>TSPAN4</b>      | 3314.16  | 1.21 | 0.33 | -3.66 | 0.000254529 | 0.005987599 |
| <b>NACC1</b>       | 4270.71  | 1.21 | 0.35 | -3.46 | 0.000550061 | 0.009880018 |
| <b>FDXR</b>        | 819.55   | 1.20 | 0.34 | -3.55 | 0.000382614 | 0.007930493 |
| <b>LY6E</b>        | 11113.91 | 1.20 | 0.34 | -3.50 | 0.000465945 | 0.008986356 |
| <b>TMEM54</b>      | 192.13   | 1.20 | 0.33 | -3.68 | 0.000236449 | 0.005640787 |
| <b>CDC25B</b>      | 3436.51  | 1.20 | 0.28 | -4.33 | 1.4998E-05  | 0.000758095 |
| <b>ZNF295-AS1</b>  | 20.21    | 1.20 | 0.44 | -2.73 | 0.00624201  | 0.045926736 |
| <b>SULT2B1</b>     | 1498.70  | 1.20 | 0.28 | -4.25 | 2.17138E-05 | 0.001025147 |
| <b>LZTS1</b>       | 247.60   | 1.20 | 0.34 | -3.51 | 0.000452182 | 0.008864767 |
| <b>SLC25A10</b>    | 1723.12  | 1.20 | 0.36 | -3.33 | 0.000881238 | 0.01358526  |
| <b>NAT14</b>       | 542.48   | 1.20 | 0.30 | -3.95 | 7.87043E-05 | 0.002578656 |
| <b>TMEM129</b>     | 1167.55  | 1.19 | 0.31 | -3.83 | 0.000129003 | 0.003724098 |
| <b>BRAT1</b>       | 2240.40  | 1.19 | 0.34 | -3.44 | 0.000572276 | 0.010158271 |
| <b>DPP7</b>        | 2300.92  | 1.19 | 0.34 | -3.54 | 0.000405013 | 0.008243955 |
| <b>BCL9L</b>       | 9299.58  | 1.18 | 0.34 | -3.52 | 0.00043822  | 0.008718017 |
| <b>ZBTB7B</b>      | 2370.59  | 1.18 | 0.33 | -3.59 | 0.000325255 | 0.007121569 |
| <b>POLRMTP1</b>    | 290.54   | 1.18 | 0.40 | -2.98 | 0.002858843 | 0.02800554  |
| <b>DOT1L</b>       | 2546.66  | 1.18 | 0.33 | -3.55 | 0.000389898 | 0.00803199  |
| <b>ACOT11</b>      | 204.72   | 1.18 | 0.33 | -3.55 | 0.000381463 | 0.007918697 |
| <b>BCL2L12</b>     | 1643.39  | 1.18 | 0.29 | -4.05 | 5.22739E-05 | 0.002007819 |
| <b>MMP28</b>       | 239.03   | 1.18 | 0.24 | -4.93 | 8.01708E-07 | 6.996E-05   |
| <b>DDN</b>         | 43.77    | 1.18 | 0.39 | -3.04 | 0.002404528 | 0.025188262 |
| <b>CYP11B1-AS1</b> | 27.53    | 1.18 | 0.38 | -3.14 | 0.001701251 | 0.020543438 |
| <b>ZNF668</b>      | 579.01   | 1.18 | 0.31 | -3.81 | 0.000140646 | 0.003943025 |
| <b>SLC25A22</b>    | 2693.53  | 1.18 | 0.34 | -3.43 | 0.00059561  | 0.010436215 |
| <b>EMC10</b>       | 386.78   | 1.18 | 0.35 | -3.32 | 0.000907026 | 0.013810567 |
| <b>MNT</b>         | 2013.89  | 1.18 | 0.34 | -3.45 | 0.000559413 | 0.010008348 |
| <b>TMEM161A</b>    | 1554.04  | 1.17 | 0.34 | -3.40 | 0.000663688 | 0.011336885 |
| <b>DHRS13</b>      | 121.14   | 1.17 | 0.32 | -3.68 | 0.000234954 | 0.005624424 |
| <b>NFIC</b>        | 4031.53  | 1.17 | 0.35 | -3.35 | 0.000817746 | 0.013035047 |
| <b>NDUFS7</b>      | 1482.17  | 1.17 | 0.36 | -3.23 | 0.001224933 | 0.016589053 |
| <b>ATP5D</b>       | 3032.23  | 1.17 | 0.33 | -3.56 | 0.000366206 | 0.007731829 |
| <b>TLL10</b>       | 214.13   | 1.17 | 0.23 | -4.98 | 6.21691E-07 | 5.6133E-05  |
| <b>TMEM8A</b>      | 2493.82  | 1.16 | 0.34 | -3.41 | 0.000654155 | 0.011216325 |

|                      |          |      |      |       |             |             |
|----------------------|----------|------|------|-------|-------------|-------------|
| <b>PLXND1</b>        | 102.71   | 1.16 | 0.36 | -3.27 | 0.001086366 | 0.015375861 |
| <b>ZNF358</b>        | 252.68   | 1.16 | 0.35 | -3.37 | 0.000754833 | 0.012425503 |
| <b>FOXD2-AS1</b>     | 55.80    | 1.16 | 0.38 | -3.06 | 0.002193656 | 0.023839395 |
| <b>UNC13D</b>        | 286.03   | 1.16 | 0.40 | -2.89 | 0.003834848 | 0.033801146 |
| <b>PELP1</b>         | 3658.21  | 1.16 | 0.34 | -3.43 | 0.000600215 | 0.010489881 |
| <b>EREG</b>          | 1538.55  | 1.16 | 0.22 | -5.32 | 1.0161E-07  | 1.40979E-05 |
| <b>TBL3</b>          | 3464.34  | 1.15 | 0.35 | -3.27 | 0.001070781 | 0.015293502 |
| <b>CALM3</b>         | 3296.49  | 1.15 | 0.26 | -4.48 | 7.48667E-06 | 0.000444525 |
| <b>FAM173A</b>       | 686.07   | 1.15 | 0.33 | -3.53 | 0.000419079 | 0.008466887 |
| <b>NACC2</b>         | 1178.86  | 1.15 | 0.31 | -3.77 | 0.000162844 | 0.004350084 |
| <b>PSKH1</b>         | 662.01   | 1.15 | 0.31 | -3.73 | 0.000187914 | 0.00483913  |
| <b>CNN2</b>          | 12302.18 | 1.15 | 0.33 | -3.50 | 0.000467261 | 0.008986356 |
| <b>ARHGEF16</b>      | 955.94   | 1.15 | 0.32 | -3.57 | 0.000351208 | 0.007508458 |
| <b>FBXO46</b>        | 1182.99  | 1.15 | 0.28 | -4.04 | 5.27179E-05 | 0.002013497 |
| <b>MT2P1</b>         | 2239.63  | 1.15 | 0.27 | -4.21 | 2.57591E-05 | 0.00116361  |
| <b>EPPK1</b>         | 8883.83  | 1.15 | 0.35 | -3.27 | 0.001066295 | 0.015261482 |
| <b>C1orf132</b>      | 53.48    | 1.15 | 0.31 | -3.69 | 0.000223139 | 0.005427575 |
| <b>TCIRG1</b>        | 2570.29  | 1.15 | 0.33 | -3.53 | 0.000420124 | 0.008475404 |
| <b>MRPS31P2</b>      | 23.78    | 1.15 | 0.40 | -2.85 | 0.004328283 | 0.03624117  |
| <b>INTS5</b>         | 1533.46  | 1.15 | 0.35 | -3.32 | 0.000904932 | 0.013807599 |
| <b>EFHD2</b>         | 4821.89  | 1.15 | 0.29 | -3.90 | 9.45193E-05 | 0.002968082 |
| <b>CARD10</b>        | 12538.49 | 1.15 | 0.33 | -3.48 | 0.000499952 | 0.009310594 |
| <b>DKFZP761J1410</b> | 1237.49  | 1.15 | 0.35 | -3.30 | 0.000976658 | 0.01450839  |
| <b>VPS51</b>         | 3044.41  | 1.15 | 0.33 | -3.51 | 0.000446611 | 0.008815268 |
| <b>ST6GALNAC4</b>    | 791.61   | 1.15 | 0.37 | -3.13 | 0.001772348 | 0.021129455 |
| <b>CASKIN2</b>       | 947.05   | 1.15 | 0.35 | -3.25 | 0.001171826 | 0.016245854 |
| <b>TRMT61A</b>       | 1714.09  | 1.15 | 0.36 | -3.20 | 0.00135727  | 0.017710947 |
| <b>GNAO1</b>         | 24.84    | 1.15 | 0.41 | -2.79 | 0.005260531 | 0.041155027 |
| <b>CDHR1</b>         | 228.93   | 1.15 | 0.25 | -4.55 | 5.30121E-06 | 0.000338559 |
| <b>MT2A</b>          | 34609.61 | 1.15 | 0.27 | -4.20 | 2.68113E-05 | 0.001199186 |
| <b>COMTD1</b>        | 1200.86  | 1.14 | 0.30 | -3.84 | 0.000121251 | 0.003553124 |
| <b>SH2D5</b>         | 6792.14  | 1.14 | 0.28 | -4.09 | 4.27068E-05 | 0.001743797 |
| <b>TMEM109</b>       | 47.38    | 1.14 | 0.37 | -3.05 | 0.002271862 | 0.024304096 |
| <b>BCAR1</b>         | 7059.72  | 1.14 | 0.33 | -3.51 | 0.000449173 | 0.008838507 |
| <b>SLC2A4RG</b>      | 2388.72  | 1.14 | 0.33 | -3.43 | 0.00059295  | 0.010416453 |
| <b>PRODH</b>         | 200.72   | 1.14 | 0.26 | -4.36 | 1.28721E-05 | 0.000689063 |
| <b>PLA2G4F</b>       | 832.23   | 1.14 | 0.30 | -3.76 | 0.00016776  | 0.004452725 |
| <b>C2CD4D</b>        | 31.73    | 1.14 | 0.38 | -3.00 | 0.002728715 | 0.027361611 |
| <b>EFNA3</b>         | 229.87   | 1.14 | 0.33 | -3.42 | 0.000632855 | 0.01093384  |
| <b>JAG2</b>          | 5544.67  | 1.14 | 0.33 | -3.44 | 0.000575174 | 0.010196404 |
| <b>HMGA1</b>         | 25419.87 | 1.14 | 0.34 | -3.32 | 0.00091445  | 0.013855665 |

|                      |          |      |      |       |             |             |
|----------------------|----------|------|------|-------|-------------|-------------|
| <b>TACC3</b>         | 2981.72  | 1.13 | 0.22 | -5.27 | 1.3687E-07  | 1.78945E-05 |
| <b>ADAM15</b>        | 13591.22 | 1.13 | 0.35 | -3.28 | 0.001021985 | 0.014830238 |
| <b>SLC25A11</b>      | 1917.13  | 1.13 | 0.32 | -3.53 | 0.000413983 | 0.00838886  |
| <b>MESDC1</b>        | 2089.55  | 1.13 | 0.28 | -4.00 | 6.44132E-05 | 0.002287225 |
| <b>TMEM63C</b>       | 205.57   | 1.13 | 0.32 | -3.59 | 0.000337006 | 0.007296609 |
| <b>POLRMT</b>        | 2876.10  | 1.13 | 0.34 | -3.34 | 0.00082395  | 0.013118563 |
| <b>FYB</b>           | 17.80    | 1.13 | 0.42 | -2.70 | 0.006863255 | 0.048223635 |
| <b>CSF1</b>          | 1501.52  | 1.13 | 0.26 | -4.34 | 1.42746E-05 | 0.000729669 |
| <b>FAM195A</b>       | 554.06   | 1.13 | 0.32 | -3.54 | 0.000399555 | 0.008157277 |
| <b>LEPREL2</b>       | 668.88   | 1.13 | 0.34 | -3.37 | 0.000760889 | 0.012510048 |
| <b>MIER2</b>         | 1206.91  | 1.13 | 0.34 | -3.35 | 0.000817466 | 0.013035047 |
| <b>SF3A2</b>         | 3907.26  | 1.13 | 0.35 | -3.24 | 0.001195644 | 0.016423036 |
| <b>FBXL18</b>        | 1375.47  | 1.13 | 0.32 | -3.47 | 0.000519056 | 0.009537305 |
| <b>PPP1R26-AS1</b>   | 34.87    | 1.13 | 0.34 | -3.31 | 0.000932528 | 0.014052646 |
| <b>MSLN</b>          | 3178.56  | 1.13 | 0.33 | -3.42 | 0.000622658 | 0.010798827 |
| <b>SREBF1</b>        | 11755.72 | 1.13 | 0.32 | -3.50 | 0.000466607 | 0.008986356 |
| <b>EPHB6</b>         | 194.10   | 1.12 | 0.38 | -2.97 | 0.003006479 | 0.028849042 |
| <b>PDDC1</b>         | 2620.77  | 1.12 | 0.30 | -3.74 | 0.0001843   | 0.004780133 |
| <b>P2RY2</b>         | 289.17   | 1.12 | 0.30 | -3.76 | 0.00017098  | 0.004522987 |
| <b>HAGHL</b>         | 511.21   | 1.12 | 0.32 | -3.48 | 0.000494722 | 0.009265476 |
| <b>CCDC85B</b>       | 6120.98  | 1.12 | 0.32 | -3.56 | 0.00037008  | 0.007797304 |
| <b>PQLC1</b>         | 4256.82  | 1.12 | 0.34 | -3.33 | 0.000868772 | 0.013500224 |
| <b>HSPBP1</b>        | 4426.06  | 1.12 | 0.33 | -3.43 | 0.000598507 | 0.010473493 |
| <b>GS1-393G12.12</b> | 43.31    | 1.12 | 0.37 | -3.01 | 0.002590203 | 0.026369027 |
| <b>PDLIM7</b>        | 3714.62  | 1.12 | 0.30 | -3.77 | 0.000160882 | 0.004323151 |
| <b>MYBBP1A</b>       | 6640.68  | 1.12 | 0.32 | -3.46 | 0.000549043 | 0.009874793 |
| <b>NAB2</b>          | 1954.12  | 1.12 | 0.29 | -3.89 | 9.83776E-05 | 0.003060961 |
| <b>PHYHIP</b>        | 134.90   | 1.12 | 0.34 | -3.26 | 0.001103067 | 0.015542387 |
| <b>TNRC18</b>        | 9129.18  | 1.12 | 0.33 | -3.36 | 0.000767287 | 0.012566419 |
| <b>EXOSC4</b>        | 636.55   | 1.12 | 0.36 | -3.07 | 0.002143543 | 0.023580707 |
| <b>NECAB3</b>        | 188.49   | 1.12 | 0.33 | -3.40 | 0.000671803 | 0.011445771 |
| <b>KIAA1875</b>      | 80.37    | 1.12 | 0.33 | -3.36 | 0.000792717 | 0.012740625 |
| <b>SPHK1</b>         | 6487.16  | 1.11 | 0.32 | -3.49 | 0.000476229 | 0.009080612 |
| <b>MAFK</b>          | 659.14   | 1.11 | 0.35 | -3.15 | 0.001650963 | 0.020187177 |
| <b>IFRD2</b>         | 5528.99  | 1.11 | 0.30 | -3.71 | 0.000208407 | 0.005191762 |
| <b>AGAP3</b>         | 6981.84  | 1.11 | 0.31 | -3.56 | 0.000373948 | 0.007836401 |
| <b>FAM83H</b>        | 22302.93 | 1.11 | 0.34 | -3.26 | 0.001109241 | 0.015597054 |
| <b>ZNF865</b>        | 797.81   | 1.11 | 0.31 | -3.58 | 0.000347516 | 0.007452949 |
| <b>TPRG1</b>         | 41.60    | 1.11 | 0.31 | -3.55 | 0.000379473 | 0.007914274 |
| <b>PPDPF</b>         | 6459.78  | 1.11 | 0.33 | -3.35 | 0.00081519  | 0.01302484  |
| <b>ZNF628</b>        | 501.29   | 1.11 | 0.38 | -2.94 | 0.003252789 | 0.03043921  |

|                      |          |      |      |       |             |             |
|----------------------|----------|------|------|-------|-------------|-------------|
| <b>C1orf86</b>       | 1716.94  | 1.11 | 0.33 | -3.33 | 0.000853183 | 0.013364898 |
| <b>TTYH3</b>         | 5900.85  | 1.11 | 0.35 | -3.12 | 0.001816749 | 0.02139627  |
| <b>RHBDF1</b>        | 1337.58  | 1.11 | 0.29 | -3.87 | 0.000106932 | 0.003267315 |
| <b>MIR429</b>        | 165.56   | 1.11 | 0.32 | -3.45 | 0.000565993 | 0.010073044 |
| <b>FAM155B</b>       | 595.11   | 1.11 | 0.34 | -3.27 | 0.001083015 | 0.015375861 |
| <b>IRAK3</b>         | 56.53    | 1.10 | 0.30 | -3.64 | 0.000270825 | 0.00628396  |
| <b>LLGL1</b>         | 2596.87  | 1.10 | 0.32 | -3.47 | 0.000511825 | 0.00945555  |
| <b>PCAT6</b>         | 40.00    | 1.10 | 0.39 | -2.81 | 0.005027863 | 0.039932155 |
| <b>PAQR5</b>         | 25.84    | 1.10 | 0.36 | -3.05 | 0.00232153  | 0.024660816 |
| <b>FGFR3</b>         | 2217.87  | 1.10 | 0.29 | -3.73 | 0.000191818 | 0.004875038 |
| <b>EHD1</b>          | 14554.26 | 1.10 | 0.30 | -3.72 | 0.000197978 | 0.004994262 |
| <b>DGAT1</b>         | 1640.21  | 1.10 | 0.33 | -3.33 | 0.000878068 | 0.01356715  |
| <b>REXO1</b>         | 3249.12  | 1.10 | 0.35 | -3.15 | 0.001632914 | 0.020056663 |
| <b>BCL3</b>          | 2167.42  | 1.10 | 0.34 | -3.24 | 0.00118778  | 0.016379554 |
| <b>TOR4A</b>         | 1356.01  | 1.10 | 0.33 | -3.33 | 0.000872242 | 0.013538674 |
| <b>BOP1</b>          | 914.25   | 1.10 | 0.33 | -3.33 | 0.000880439 | 0.01358526  |
| <b>ANO7</b>          | 37.78    | 1.10 | 0.39 | -2.80 | 0.005170873 | 0.040711269 |
| <b>MAZ</b>           | 769.32   | 1.10 | 0.31 | -3.49 | 0.000479799 | 0.00909879  |
| <b>RP11-478C19.2</b> | 222.05   | 1.10 | 0.32 | -3.40 | 0.000668854 | 0.011410793 |
| <b>PIEZO1</b>        | 16376.30 | 1.10 | 0.33 | -3.34 | 0.000838364 | 0.013247296 |
| <b>SPPL2B</b>        | 1421.42  | 1.09 | 0.32 | -3.43 | 0.000595051 | 0.010436215 |
| <b>AURKB</b>         | 1836.26  | 1.09 | 0.25 | -4.42 | 9.78805E-06 | 0.000552233 |
| <b>COL7A1</b>        | 25312.35 | 1.09 | 0.32 | -3.41 | 0.000641781 | 0.011066297 |
| <b>MST1R</b>         | 4253.20  | 1.09 | 0.30 | -3.69 | 0.000226272 | 0.005475789 |
| <b>C1orf159</b>      | 1403.04  | 1.09 | 0.32 | -3.41 | 0.00064215  | 0.011066297 |
| <b>SECTM1</b>        | 182.56   | 1.09 | 0.33 | -3.31 | 0.00093326  | 0.014052646 |
| <b>KLF16</b>         | 1436.81  | 1.09 | 0.32 | -3.36 | 0.000787091 | 0.012719583 |
| <b>MXRA8</b>         | 320.81   | 1.09 | 0.31 | -3.53 | 0.000410814 | 0.008337063 |
| <b>PPP1R3F</b>       | 134.69   | 1.09 | 0.35 | -3.13 | 0.001737409 | 0.020795379 |
| <b>ATP13A1</b>       | 4023.79  | 1.09 | 0.33 | -3.26 | 0.001127781 | 0.015808701 |
| <b>GRWD1</b>         | 4603.67  | 1.09 | 0.34 | -3.24 | 0.001201632 | 0.01644112  |
| <b>SBNO2</b>         | 4887.78  | 1.09 | 0.32 | -3.42 | 0.000619986 | 0.010779682 |
| <b>C2orf48</b>       | 103.98   | 1.08 | 0.27 | -3.98 | 6.8751E-05  | 0.002366601 |
| <b>SPHK2</b>         | 696.87   | 1.08 | 0.37 | -2.92 | 0.003459981 | 0.03161447  |
| <b>ANGPTL4</b>       | 367.42   | 1.08 | 0.33 | -3.25 | 0.001139777 | 0.015890257 |
| <b>TGFBR3L</b>       | 45.45    | 1.08 | 0.39 | -2.80 | 0.005059876 | 0.040116114 |
| <b>CARD14</b>        | 51.23    | 1.08 | 0.31 | -3.50 | 0.000471381 | 0.009014579 |
| <b>MAPK8IP2</b>      | 230.07   | 1.08 | 0.33 | -3.30 | 0.00098137  | 0.014551458 |
| <b>RP11-611L7.1</b>  | 692.21   | 1.08 | 0.31 | -3.44 | 0.000588208 | 0.010359928 |
| <b>PLEKHJ1</b>       | 1966.51  | 1.08 | 0.31 | -3.46 | 0.000541924 | 0.009798591 |
| <b>CDHR2</b>         | 57.22    | 1.08 | 0.31 | -3.52 | 0.000439146 | 0.008718017 |

|                      |          |      |      |       |             |             |
|----------------------|----------|------|------|-------|-------------|-------------|
| <b>STAT5A</b>        | 1472.92  | 1.08 | 0.24 | -4.43 | 9.52257E-06 | 0.000539493 |
| <b>DUS3L</b>         | 1534.85  | 1.07 | 0.31 | -3.42 | 0.000627797 | 0.010860242 |
| <b>CHCHD10</b>       | 427.42   | 1.07 | 0.27 | -3.97 | 7.0624E-05  | 0.002418829 |
| <b>FOXK1</b>         | 2845.90  | 1.07 | 0.32 | -3.34 | 0.000846935 | 0.01332845  |
| <b>RBM38</b>         | 1224.72  | 1.07 | 0.33 | -3.29 | 0.001019701 | 0.014812904 |
| <b>TMUB1</b>         | 1648.93  | 1.07 | 0.33 | -3.22 | 0.001281995 | 0.017089493 |
| <b>METRNL</b>        | 1736.04  | 1.07 | 0.32 | -3.31 | 0.000937514 | 0.014073158 |
| <b>ATAD3A</b>        | 3795.74  | 1.07 | 0.32 | -3.36 | 0.00077565  | 0.012630554 |
| <b>POM121C</b>       | 1691.66  | 1.07 | 0.34 | -3.14 | 0.00170061  | 0.020543438 |
| <b>RET</b>           | 117.60   | 1.07 | 0.26 | -4.07 | 4.66582E-05 | 0.001849596 |
| <b>PPAP2C</b>        | 466.67   | 1.07 | 0.35 | -3.07 | 0.002131595 | 0.023525407 |
| <b>CLUH</b>          | 17085.03 | 1.07 | 0.32 | -3.38 | 0.000721178 | 0.012046506 |
| <b>ZNF787</b>        | 1812.98  | 1.07 | 0.35 | -3.07 | 0.002112427 | 0.023389797 |
| <b>UFSP1</b>         | 33.58    | 1.07 | 0.37 | -2.86 | 0.004176185 | 0.035423326 |
| <b>FBLN2</b>         | 238.17   | 1.07 | 0.30 | -3.61 | 0.0003098   | 0.006838236 |
| <b>C15orf52</b>      | 2308.63  | 1.07 | 0.21 | -4.98 | 6.41479E-07 | 5.73828E-05 |
| <b>KIAA1549</b>      | 284.82   | 1.06 | 0.24 | -4.40 | 1.06418E-05 | 0.0005906   |
| <b>RNASEH2C</b>      | 387.15   | 1.06 | 0.31 | -3.49 | 0.000487566 | 0.009169339 |
| <b>APRT</b>          | 2683.25  | 1.06 | 0.33 | -3.18 | 0.001477301 | 0.018673893 |
| <b>PTPN23</b>        | 3819.87  | 1.06 | 0.35 | -3.06 | 0.002247242 | 0.024183143 |
| <b>PNKP</b>          | 1789.06  | 1.06 | 0.28 | -3.78 | 0.000157581 | 0.00425125  |
| <b>SLC25A39</b>      | 8066.04  | 1.06 | 0.32 | -3.31 | 0.000938011 | 0.014073158 |
| <b>CST3</b>          | 4058.55  | 1.06 | 0.27 | -3.86 | 0.000111967 | 0.003368173 |
| <b>MED16</b>         | 2091.68  | 1.06 | 0.36 | -2.97 | 0.002962883 | 0.028612441 |
| <b>RP11-465B22.8</b> | 1119.09  | 1.06 | 0.30 | -3.49 | 0.000490057 | 0.009203468 |
| <b>C7orf50</b>       | 3257.85  | 1.06 | 0.32 | -3.27 | 0.001086526 | 0.015375861 |
| <b>PTPRS</b>         | 928.10   | 1.06 | 0.30 | -3.55 | 0.000386977 | 0.008004449 |
| <b>FAM207BP</b>      | 33.70    | 1.06 | 0.35 | -2.98 | 0.002855121 | 0.027989243 |
| <b>GIGYF1</b>        | 2645.31  | 1.06 | 0.31 | -3.46 | 0.000538845 | 0.009779213 |
| <b>LRWD1</b>         | 1246.36  | 1.06 | 0.33 | -3.22 | 0.001279182 | 0.017089493 |
| <b>NR2F6</b>         | 1444.93  | 1.06 | 0.30 | -3.47 | 0.000517213 | 0.009516307 |
| <b>SYNGR1</b>        | 111.23   | 1.06 | 0.36 | -2.89 | 0.003794234 | 0.033598093 |
| <b>TPGS1</b>         | 272.69   | 1.06 | 0.30 | -3.50 | 0.000470441 | 0.009009271 |
| <b>ARHGEF4</b>       | 3662.24  | 1.06 | 0.24 | -4.40 | 1.09254E-05 | 0.000599    |
| <b>MT-ND6</b>        | 36529.48 | 1.06 | 0.28 | -3.75 | 0.000179551 | 0.004694911 |
| <b>FLNC</b>          | 93.72    | 1.06 | 0.34 | -3.07 | 0.002167597 | 0.023711037 |
| <b>DNM1</b>          | 119.84   | 1.05 | 0.32 | -3.28 | 0.001040037 | 0.015044024 |
| <b>SORCS2</b>        | 40.22    | 1.05 | 0.36 | -2.93 | 0.003385315 | 0.031179252 |
| <b>GPC1</b>          | 9934.83  | 1.05 | 0.34 | -3.09 | 0.002025297 | 0.022758648 |
| <b>RELL2</b>         | 321.92   | 1.05 | 0.31 | -3.36 | 0.000786694 | 0.012719583 |
| <b>GPR144</b>        | 36.22    | 1.05 | 0.36 | -2.89 | 0.00390999  | 0.034098918 |

|                 |          |      |      |       |             |             |
|-----------------|----------|------|------|-------|-------------|-------------|
| <b>SLC43A1</b>  | 128.59   | 1.05 | 0.27 | -3.95 | 7.91533E-05 | 0.002581941 |
| <b>ISOC2</b>    | 1186.13  | 1.05 | 0.33 | -3.22 | 0.001285374 | 0.017104421 |
| <b>ILVBL</b>    | 2227.49  | 1.05 | 0.34 | -3.06 | 0.002216655 | 0.024034977 |
| <b>TBX1</b>     | 92.83    | 1.05 | 0.36 | -2.93 | 0.003386906 | 0.031179252 |
| <b>NINJ1</b>    | 3040.42  | 1.05 | 0.28 | -3.82 | 0.000134146 | 0.003823852 |
| <b>SIRPB2</b>   | 34.25    | 1.05 | 0.35 | -2.99 | 0.002820388 | 0.027835316 |
| <b>THEM6</b>    | 421.31   | 1.05 | 0.37 | -2.87 | 0.004099873 | 0.034906687 |
| <b>PER2</b>     | 235.79   | 1.05 | 0.26 | -3.98 | 6.84185E-05 | 0.002366601 |
| <b>FANCE</b>    | 492.62   | 1.05 | 0.30 | -3.51 | 0.000440599 | 0.008732974 |
| <b>DVL1</b>     | 9114.82  | 1.05 | 0.33 | -3.19 | 0.001400847 | 0.01808862  |
| <b>MT-ND3</b>   | 22969.29 | 1.05 | 0.31 | -3.33 | 0.000865118 | 0.013489697 |
| <b>PPP1R13L</b> | 7732.58  | 1.04 | 0.33 | -3.20 | 0.001388635 | 0.01798684  |
| <b>WDR4</b>     | 3245.66  | 1.04 | 0.27 | -3.82 | 0.000131848 | 0.003774184 |
| <b>ADAMTSL4</b> | 398.75   | 1.04 | 0.32 | -3.29 | 0.001001337 | 0.014655732 |
| <b>CCND1</b>    | 4598.99  | 1.04 | 0.16 | -6.40 | 1.60113E-10 | 6.59713E-08 |
| <b>ESRRA</b>    | 2712.01  | 1.04 | 0.32 | -3.25 | 0.001134185 | 0.015833179 |
| <b>SBF1</b>     | 8431.28  | 1.04 | 0.35 | -2.99 | 0.002820995 | 0.027835316 |
| <b>TMEM79</b>   | 768.62   | 1.04 | 0.32 | -3.24 | 0.001182867 | 0.016333084 |
| <b>RPUSD1</b>   | 1953.74  | 1.04 | 0.37 | -2.78 | 0.005378559 | 0.041776627 |
| <b>CYC1</b>     | 4600.26  | 1.04 | 0.27 | -3.87 | 0.000108985 | 0.003313715 |
| <b>MBD3</b>     | 3699.81  | 1.04 | 0.35 | -2.99 | 0.002781107 | 0.027642335 |
| <b>ALDH16A1</b> | 502.00   | 1.04 | 0.37 | -2.81 | 0.004917422 | 0.039485788 |
| <b>OXLD1</b>    | 317.07   | 1.04 | 0.32 | -3.25 | 0.001152862 | 0.016044482 |
| <b>PSD4</b>     | 2859.20  | 1.04 | 0.29 | -3.61 | 0.000303131 | 0.006723774 |
| <b>GIPC1</b>    | 11654.42 | 1.03 | 0.34 | -3.03 | 0.002423959 | 0.025352749 |
| <b>40057.00</b> | 16352.67 | 1.03 | 0.31 | -3.31 | 0.000936542 | 0.014073158 |
| <b>ASPCR1</b>   | 874.76   | 1.03 | 0.34 | -3.06 | 0.002182058 | 0.023811751 |
| <b>WDR34</b>    | 2869.03  | 1.03 | 0.33 | -3.14 | 0.001717818 | 0.020651791 |
| <b>PRR22</b>    | 131.64   | 1.03 | 0.29 | -3.57 | 0.000352591 | 0.007514392 |
| <b>KLHL26</b>   | 267.48   | 1.03 | 0.33 | -3.10 | 0.001914807 | 0.022026757 |
| <b>NOC4L</b>    | 1534.39  | 1.03 | 0.35 | -2.99 | 0.002799878 | 0.027747775 |
| <b>KCTD11</b>   | 420.33   | 1.03 | 0.34 | -3.05 | 0.002260774 | 0.024261834 |
| <b>RHOT2</b>    | 4771.50  | 1.03 | 0.30 | -3.42 | 0.000623571 | 0.01080089  |
| <b>CISD3</b>    | 992.15   | 1.03 | 0.32 | -3.24 | 0.001195764 | 0.016423036 |
| <b>PCNXL3</b>   | 4860.32  | 1.03 | 0.34 | -3.01 | 0.002644579 | 0.026811754 |
| <b>LRRC45</b>   | 763.48   | 1.03 | 0.32 | -3.22 | 0.001264302 | 0.017008684 |
| <b>VAR5</b>     | 10713.45 | 1.03 | 0.33 | -3.07 | 0.002112197 | 0.023389797 |
| <b>CTSD</b>     | 1180.35  | 1.03 | 0.34 | -3.05 | 0.002274739 | 0.024315741 |
| <b>G6PC3</b>    | 1216.02  | 1.03 | 0.34 | -3.04 | 0.002327853 | 0.024708683 |
| <b>ZDHHC12</b>  | 2325.25  | 1.03 | 0.35 | -2.93 | 0.003383209 | 0.031179252 |
| <b>SH2D3A</b>   | 2776.08  | 1.02 | 0.26 | -3.87 | 0.000109182 | 0.003313715 |

|                     |          |      |      |       |             |             |
|---------------------|----------|------|------|-------|-------------|-------------|
| <b>CTD-2228K2.5</b> | 67.35    | 1.02 | 0.27 | -3.85 | 0.000118466 | 0.003514569 |
| <b>TM7SF2</b>       | 870.20   | 1.02 | 0.31 | -3.30 | 0.000974377 | 0.014495193 |
| <b>ENDOG</b>        | 175.72   | 1.02 | 0.35 | -2.90 | 0.003748835 | 0.033359231 |
| <b>LTBP3</b>        | 1571.23  | 1.02 | 0.32 | -3.19 | 0.001417351 | 0.018232469 |
| <b>C16orf13</b>     | 1204.27  | 1.02 | 0.33 | -3.14 | 0.001704644 | 0.020560733 |
| <b>KIF26A</b>       | 58.65    | 1.02 | 0.38 | -2.69 | 0.007120102 | 0.049464084 |
| <b>DUSP6</b>        | 602.40   | 1.02 | 0.27 | -3.72 | 0.000201177 | 0.005055857 |
| <b>RP11-54F2.1</b>  | 213.82   | 1.02 | 0.19 | -5.42 | 5.978E-08   | 9.5627E-06  |
| <b>SIRT6</b>        | 1393.96  | 1.02 | 0.32 | -3.16 | 0.001581123 | 0.019581242 |
| <b>TMEM38A</b>      | 104.36   | 1.02 | 0.32 | -3.19 | 0.001411108 | 0.018178666 |
| <b>C20orf27</b>     | 1964.11  | 1.02 | 0.35 | -2.88 | 0.004026182 | 0.034517023 |
| <b>NCAPH2</b>       | 2976.95  | 1.02 | 0.29 | -3.46 | 0.000535848 | 0.009740551 |
| <b>EFS</b>          | 852.73   | 1.02 | 0.30 | -3.36 | 0.000790868 | 0.012738896 |
| <b>PKN3</b>         | 520.02   | 1.02 | 0.29 | -3.49 | 0.000477505 | 0.009080612 |
| <b>CDH4</b>         | 1352.87  | 1.02 | 0.30 | -3.40 | 0.000685857 | 0.011598999 |
| <b>PC</b>           | 3333.94  | 1.02 | 0.31 | -3.27 | 0.001086725 | 0.015375861 |
| <b>BRD4</b>         | 4559.68  | 1.02 | 0.32 | -3.16 | 0.001603292 | 0.019818149 |
| <b>IMPDH1</b>       | 4994.38  | 1.02 | 0.32 | -3.14 | 0.001673871 | 0.020361764 |
| <b>PER1</b>         | 5302.32  | 1.02 | 0.35 | -2.95 | 0.003161906 | 0.029939018 |
| <b>YIF1A</b>        | 2404.46  | 1.02 | 0.34 | -3.02 | 0.002523252 | 0.026014143 |
| <b>ATP6V0B</b>      | 4893.20  | 1.02 | 0.36 | -2.86 | 0.004255767 | 0.035834966 |
| <b>RAC3</b>         | 585.52   | 1.02 | 0.36 | -2.84 | 0.004470161 | 0.037129373 |
| <b>NCLN</b>         | 10879.70 | 1.02 | 0.35 | -2.89 | 0.003852641 | 0.033840027 |
| <b>UBE2S</b>        | 1114.82  | 1.02 | 0.28 | -3.64 | 0.000277714 | 0.006400121 |
| <b>CCDC61</b>       | 401.86   | 1.02 | 0.29 | -3.47 | 0.000528961 | 0.009654066 |
| <b>SULT1A1</b>      | 165.80   | 1.02 | 0.29 | -3.55 | 0.000392242 | 0.008056373 |
| <b>FOXRED2</b>      | 555.11   | 1.02 | 0.28 | -3.57 | 0.000356003 | 0.007575227 |
| <b>ARRDC1</b>       | 3173.95  | 1.02 | 0.32 | -3.22 | 0.001281763 | 0.017089493 |
| <b>CBLC</b>         | 2056.54  | 1.01 | 0.29 | -3.46 | 0.000544338 | 0.009803122 |
| <b>LAT2</b>         | 71.13    | 1.01 | 0.31 | -3.22 | 0.001271118 | 0.017061591 |
| <b>ZNF316</b>       | 1132.30  | 1.01 | 0.32 | -3.21 | 0.001341184 | 0.017585415 |
| <b>MFSD10</b>       | 7970.37  | 1.01 | 0.32 | -3.13 | 0.00177309  | 0.021129455 |
| <b>LTBR</b>         | 5083.33  | 1.01 | 0.28 | -3.57 | 0.000360655 | 0.007638353 |
| <b>TRMT2A</b>       | 1123.20  | 1.01 | 0.33 | -3.06 | 0.002231577 | 0.024098677 |
| <b>B4GALT2</b>      | 5012.19  | 1.01 | 0.33 | -3.12 | 0.001839333 | 0.021578433 |
| <b>ARHGEF39</b>     | 68.50    | 1.01 | 0.28 | -3.61 | 0.000301518 | 0.006704671 |
| <b>HOXC11</b>       | 282.86   | 1.01 | 0.23 | -4.34 | 1.40792E-05 | 0.000727079 |
| <b>ADCK4</b>        | 807.54   | 1.01 | 0.32 | -3.15 | 0.00164014  | 0.020109099 |
| <b>RAD23A</b>       | 4718.26  | 1.01 | 0.31 | -3.29 | 0.001000817 | 0.014655732 |
| <b>MEX3A</b>        | 107.49   | 1.01 | 0.29 | -3.50 | 0.000462092 | 0.008962129 |
| <b>ADCK5</b>        | 586.51   | 1.01 | 0.31 | -3.22 | 0.001264675 | 0.017008684 |

|                       |          |       |      |       |             |             |
|-----------------------|----------|-------|------|-------|-------------|-------------|
| <b>ZNF524</b>         | 341.13   | 1.01  | 0.35 | -2.88 | 0.004012855 | 0.034469661 |
| <b>DCXR</b>           | 834.38   | 1.01  | 0.31 | -3.29 | 0.000998169 | 0.014655732 |
| <b>RASIP1</b>         | 675.34   | 1.01  | 0.32 | -3.12 | 0.001790454 | 0.0212431   |
| <b>PGP</b>            | 820.60   | 1.01  | 0.25 | -4.08 | 4.5977E-05  | 0.001827923 |
| <b>BAK1</b>           | 2542.84  | 1.01  | 0.33 | -3.07 | 0.002125211 | 0.023510979 |
| <b>AKT1S1</b>         | 4733.54  | 1.01  | 0.33 | -3.09 | 0.001997649 | 0.022635028 |
| <b>RARA</b>           | 480.67   | 1.01  | 0.32 | -3.11 | 0.001866792 | 0.021639196 |
| <b>DUSP23</b>         | 650.19   | 1.01  | 0.30 | -3.33 | 0.000866472 | 0.013490079 |
| <b>C17orf53</b>       | 532.40   | 1.01  | 0.24 | -4.12 | 3.85807E-05 | 0.001614099 |
| <b>MIR663A</b>        | 255.94   | 1.01  | 0.32 | -3.14 | 0.001688952 | 0.020467634 |
| <b>AXL</b>            | 852.90   | 1.01  | 0.17 | -6.04 | 1.49893E-09 | 4.73976E-07 |
| <b>ARFRP1</b>         | 1872.26  | 1.01  | 0.29 | -3.42 | 0.000620761 | 0.010779682 |
| <b>TIMM17B</b>        | 1402.80  | 1.01  | 0.35 | -2.89 | 0.003896802 | 0.034051938 |
| <b>WDR24</b>          | 592.06   | 1.00  | 0.33 | -3.01 | 0.002594935 | 0.026389929 |
| <b>SNAPC4</b>         | 1998.77  | 1.00  | 0.29 | -3.45 | 0.000559083 | 0.010008348 |
| <b>SEMA4C</b>         | 557.59   | 1.00  | 0.30 | -3.38 | 0.000736496 | 0.012210955 |
| <b>TMEM175</b>        | 691.18   | 1.00  | 0.30 | -3.29 | 0.000993432 | 0.014634559 |
| <b>C9orf16</b>        | 1686.52  | 1.00  | 0.33 | -3.06 | 0.002195828 | 0.023839395 |
| <b>FZR1</b>           | 2649.62  | 1.00  | 0.33 | -3.06 | 0.002228433 | 0.024098677 |
| <b>RP11-1055B8.7</b>  | 740.57   | 1.00  | 0.35 | -2.90 | 0.003788244 | 0.033578068 |
| <b>FBXW9</b>          | 498.76   | 1.00  | 0.30 | -3.34 | 0.000850155 | 0.013363656 |
| <b>RP11-215G15.5</b>  | 235.10   | 1.00  | 0.20 | -5.09 | 3.5582E-07  | 3.75046E-05 |
| <b>TMEM134</b>        | 800.21   | 1.00  | 0.32 | -3.09 | 0.002021949 | 0.022758648 |
| <b>PKP3</b>           | 13159.86 | 1.00  | 0.30 | -3.29 | 0.001013192 | 0.014770654 |
| <b>ZFP36L1</b>        | 8243.97  | 1.00  | 0.25 | -4.07 | 4.7665E-05  | 0.001878553 |
| <b>NDOR1</b>          | 1805.92  | 1.00  | 0.34 | -2.97 | 0.002978623 | 0.028682958 |
| <b>GMEB2</b>          | 1587.34  | 1.00  | 0.31 | -3.28 | 0.001043383 | 0.015076381 |
| <b>ZNF213</b>         | 746.39   | 1.00  | 0.35 | -2.87 | 0.00408169  | 0.034839129 |
| <b>DRAP1</b>          | 7103.01  | 1.00  | 0.23 | -4.33 | 1.45841E-05 | 0.000739925 |
| <b>SLC12A4</b>        | 5020.33  | 1.00  | 0.31 | -3.28 | 0.001049434 | 0.015147718 |
| <b>RP11-1096G20.5</b> | 246.66   | 1.00  | 0.28 | -3.62 | 0.000293556 | 0.006597482 |
| <b>COMMD2</b>         | 435.24   | -1.00 | 0.26 | 3.84  | 0.00012252  | 0.003574915 |
| <b>RP11-2H8.2</b>     | 35.43    | -1.00 | 0.37 | 2.70  | 0.006871068 | 0.048232271 |
| <b>ARHGEF12</b>       | 2745.08  | -1.01 | 0.18 | 5.50  | 3.88844E-08 | 6.95672E-06 |
| <b>VLDLR</b>          | 92.20    | -1.01 | 0.26 | 3.90  | 9.49052E-05 | 0.002969542 |
| <b>PRKRIR</b>         | 362.13   | -1.01 | 0.26 | 3.82  | 0.000134977 | 0.003831489 |
| <b>MYLIP</b>          | 97.64    | -1.01 | 0.26 | 3.82  | 0.000133327 | 0.003808513 |
| <b>TNFSF10</b>        | 247.29   | -1.01 | 0.20 | 4.92  | 8.52443E-07 | 7.38259E-05 |
| <b>AC005224.2</b>     | 28.82    | -1.01 | 0.36 | 2.81  | 0.00498291  | 0.039753053 |
| <b>CTC-436P18.3</b>   | 27.08    | -1.01 | 0.36 | 2.78  | 0.005383    | 0.041776627 |
| <b>RP13-631K18.5</b>  | 36.87    | -1.01 | 0.32 | 3.12  | 0.001795383 | 0.021246149 |

|                      |          |       |      |      |             |             |
|----------------------|----------|-------|------|------|-------------|-------------|
| <b>RFTN1P1</b>       | 40.55    | -1.01 | 0.32 | 3.21 | 0.00134686  | 0.017625853 |
| <b>AP2B1</b>         | 3365.29  | -1.02 | 0.20 | 5.12 | 3.12266E-07 | 3.34321E-05 |
| <b>RCBTB1</b>        | 358.28   | -1.02 | 0.22 | 4.66 | 3.20565E-06 | 0.000233087 |
| <b>ROBO2</b>         | 70.72    | -1.02 | 0.27 | 3.85 | 0.00012054  | 0.003547569 |
| <b>KRT75</b>         | 1796.31  | -1.02 | 0.15 | 6.64 | 3.09229E-11 | 1.50164E-08 |
| <b>SLC35B4</b>       | 248.73   | -1.02 | 0.19 | 5.26 | 1.42099E-07 | 1.82275E-05 |
| <b>OCRL</b>          | 698.67   | -1.02 | 0.19 | 5.51 | 3.64911E-08 | 6.61559E-06 |
| <b>CTSO</b>          | 55.38    | -1.03 | 0.35 | 2.92 | 0.003462083 | 0.03161447  |
| <b>ATG4A</b>         | 64.05    | -1.03 | 0.28 | 3.66 | 0.000249422 | 0.005894669 |
| <b>KRT34</b>         | 1606.18  | -1.03 | 0.18 | 5.69 | 1.28334E-08 | 2.56611E-06 |
| <b>SLFN5</b>         | 3131.31  | -1.04 | 0.24 | 4.26 | 2.08983E-05 | 0.000993548 |
| <b>ZNF135</b>        | 62.19    | -1.04 | 0.33 | 3.18 | 0.001469539 | 0.018632549 |
| <b>SPON1</b>         | 29.17    | -1.04 | 0.37 | 2.79 | 0.005210132 | 0.040901939 |
| <b>KLF6</b>          | 16751.19 | -1.04 | 0.16 | 6.39 | 1.66308E-10 | 6.65085E-08 |
| <b>DDX60</b>         | 1745.46  | -1.04 | 0.31 | 3.39 | 0.000701002 | 0.011796449 |
| <b>RHOQ</b>          | 33.69    | -1.04 | 0.33 | 3.20 | 0.001396257 | 0.018046484 |
| <b>KDEL3</b>         | 71.01    | -1.04 | 0.25 | 4.12 | 3.79287E-05 | 0.001591716 |
| <b>TSPYL5</b>        | 148.08   | -1.04 | 0.25 | 4.23 | 2.30956E-05 | 0.001071778 |
| <b>PIK3CB</b>        | 563.23   | -1.05 | 0.18 | 5.91 | 3.48811E-09 | 9.12075E-07 |
| <b>YIPF6</b>         | 487.20   | -1.05 | 0.21 | 4.97 | 6.76316E-07 | 6.01037E-05 |
| <b>RP11-517B11.7</b> | 37.17    | -1.05 | 0.38 | 2.75 | 0.006035884 | 0.044773547 |
| <b>SYTL2</b>         | 46.78    | -1.06 | 0.32 | 3.29 | 0.000986963 | 0.01459073  |
| <b>SNCAIP</b>        | 40.32    | -1.06 | 0.35 | 3.01 | 0.002578651 | 0.026325829 |
| <b>TAGLN</b>         | 786.24   | -1.07 | 0.22 | 4.89 | 1.01011E-06 | 8.47805E-05 |
| <b>RASSF6</b>        | 192.37   | -1.08 | 0.24 | 4.49 | 7.01874E-06 | 0.000426044 |
| <b>KRT15</b>         | 2745.68  | -1.08 | 0.15 | 7.35 | 2.03796E-13 | 2.13155E-10 |
| <b>TMED2</b>         | 3722.80  | -1.08 | 0.21 | 5.23 | 1.72952E-07 | 2.09967E-05 |
| <b>C2orf27A</b>      | 70.51    | -1.08 | 0.28 | 3.85 | 0.000116102 | 0.003461925 |
| <b>PIK3IP1</b>       | 159.42   | -1.09 | 0.23 | 4.82 | 1.41715E-06 | 0.000114697 |
| <b>RND1</b>          | 75.76    | -1.10 | 0.25 | 4.40 | 1.08094E-05 | 0.000595043 |
| <b>COG6</b>          | 258.16   | -1.10 | 0.24 | 4.67 | 2.96438E-06 | 0.000216703 |
| <b>RPS6KL1</b>       | 37.99    | -1.11 | 0.35 | 3.18 | 0.00145262  | 0.018516646 |
| <b>ZNF165</b>        | 368.98   | -1.11 | 0.20 | 5.57 | 2.5655E-08  | 4.84488E-06 |
| <b>FAM115A</b>       | 181.01   | -1.11 | 0.22 | 4.95 | 7.49602E-07 | 6.6184E-05  |
| <b>CENPQ</b>         | 189.16   | -1.12 | 0.28 | 4.03 | 5.62844E-05 | 0.002108262 |
| <b>LARP6</b>         | 171.74   | -1.12 | 0.19 | 5.74 | 9.50429E-09 | 1.9288E-06  |
| <b>ANKRD19P</b>      | 23.58    | -1.12 | 0.39 | 2.91 | 0.003622536 | 0.032533439 |
| <b>RCAN1</b>         | 2603.32  | -1.12 | 0.18 | 6.10 | 1.03261E-09 | 3.51011E-07 |
| <b>CYP2R1</b>        | 93.95    | -1.12 | 0.27 | 4.20 | 2.71209E-05 | 0.001203951 |
| <b>LCA5</b>          | 19.52    | -1.12 | 0.41 | 2.76 | 0.005861751 | 0.044058723 |
| <b>FBXO32</b>        | 44.10    | -1.12 | 0.31 | 3.62 | 0.000295709 | 0.00662398  |

|                      |         |       |      |      |             |             |
|----------------------|---------|-------|------|------|-------------|-------------|
| <b>TCHH</b>          | 63.62   | -1.12 | 0.28 | 3.97 | 7.27619E-05 | 0.002461053 |
| <b>ZXDA</b>          | 109.78  | -1.13 | 0.28 | 3.98 | 6.87168E-05 | 0.002366601 |
| <b>S100A7</b>        | 119.65  | -1.13 | 0.22 | 5.20 | 2.04707E-07 | 2.39948E-05 |
| <b>RND3</b>          | 7959.37 | -1.13 | 0.22 | 5.12 | 3.03432E-07 | 3.27442E-05 |
| <b>INA</b>           | 27.43   | -1.13 | 0.38 | 3.01 | 0.002597615 | 0.026397433 |
| <b>TXNIP</b>         | 252.13  | -1.13 | 0.25 | 4.58 | 4.56995E-06 | 0.000303651 |
| <b>ZPLD1</b>         | 36.07   | -1.13 | 0.35 | 3.23 | 0.001244177 | 0.01679948  |
| <b>KCNJ2</b>         | 68.22   | -1.13 | 0.35 | 3.21 | 0.001349603 | 0.017644757 |
| <b>MGAT4A</b>        | 41.98   | -1.14 | 0.37 | 3.08 | 0.002048242 | 0.022865311 |
| <b>ASNS</b>          | 705.06  | -1.14 | 0.22 | 5.28 | 1.27181E-07 | 1.72928E-05 |
| <b>SLC27A6</b>       | 115.23  | -1.14 | 0.27 | 4.18 | 2.9055E-05  | 0.001270292 |
| <b>NXT2</b>          | 125.36  | -1.15 | 0.26 | 4.34 | 1.4162E-05  | 0.000727079 |
| <b>CD200</b>         | 31.00   | -1.15 | 0.36 | 3.17 | 0.001536268 | 0.019216779 |
| <b>EPB41</b>         | 361.26  | -1.15 | 0.19 | 6.15 | 7.55016E-10 | 2.70157E-07 |
| <b>AC005083.1</b>    | 24.86   | -1.15 | 0.39 | 2.93 | 0.003407772 | 0.031286616 |
| <b>MAP3K8</b>        | 627.75  | -1.15 | 0.21 | 5.41 | 6.24097E-08 | 9.75384E-06 |
| <b>APOBEC3G</b>      | 31.43   | -1.16 | 0.36 | 3.17 | 0.001503992 | 0.018917463 |
| <b>BST2</b>          | 42.90   | -1.16 | 0.32 | 3.69 | 0.000227249 | 0.005478548 |
| <b>HIST1H2BD</b>     | 173.66  | -1.16 | 0.20 | 5.83 | 5.44439E-09 | 1.23379E-06 |
| <b>LRRK2</b>         | 23.77   | -1.16 | 0.42 | 2.79 | 0.005230626 | 0.04099183  |
| <b>BPGM</b>          | 635.21  | -1.17 | 0.23 | 5.17 | 2.38653E-07 | 2.68179E-05 |
| <b>GALNT5</b>        | 368.05  | -1.17 | 0.22 | 5.28 | 1.29217E-07 | 1.73956E-05 |
| <b>IL1B</b>          | 5626.22 | -1.17 | 0.16 | 7.22 | 5.29352E-13 | 4.23388E-10 |
| <b>ERBB2IP</b>       | 1032.46 | -1.18 | 0.22 | 5.44 | 5.40699E-08 | 8.96571E-06 |
| <b>SNRNP27</b>       | 114.19  | -1.18 | 0.21 | 5.48 | 4.31824E-08 | 7.4323E-06  |
| <b>MSMO1</b>         | 4621.80 | -1.18 | 0.24 | 4.98 | 6.21501E-07 | 5.6133E-05  |
| <b>RP11-20B7.1</b>   | 46.36   | -1.19 | 0.30 | 3.99 | 6.50229E-05 | 0.002296405 |
| <b>FYTTD1</b>        | 754.82  | -1.19 | 0.26 | 4.57 | 4.77388E-06 | 0.000312629 |
| <b>AC107399.2</b>    | 21.45   | -1.19 | 0.39 | 3.06 | 0.002194606 | 0.023839395 |
| <b>BEND7</b>         | 102.89  | -1.19 | 0.24 | 5.04 | 4.60455E-07 | 4.47349E-05 |
| <b>RP11-690G19.3</b> | 27.14   | -1.19 | 0.35 | 3.38 | 0.000733514 | 0.012197674 |
| <b>RP11-3L8.3</b>    | 56.25   | -1.20 | 0.27 | 4.42 | 9.99077E-06 | 0.000559031 |
| <b>ZSCAN31</b>       | 102.59  | -1.20 | 0.25 | 4.85 | 1.21122E-06 | 0.00010042  |
| <b>RSAD2</b>         | 192.83  | -1.21 | 0.29 | 4.23 | 2.35208E-05 | 0.001084108 |
| <b>LEPR</b>          | 128.38  | -1.22 | 0.25 | 4.84 | 1.28714E-06 | 0.000105429 |
| <b>ERO1LB</b>        | 29.83   | -1.23 | 0.35 | 3.46 | 0.000530928 | 0.009676983 |
| <b>ARL5B</b>         | 1724.07 | -1.23 | 0.25 | 4.88 | 1.05365E-06 | 8.78928E-05 |
| <b>FAM46A</b>        | 135.83  | -1.23 | 0.24 | 5.19 | 2.12801E-07 | 2.47303E-05 |
| <b>AC005682.6</b>    | 20.58   | -1.24 | 0.42 | 2.97 | 0.002970335 | 0.02864372  |
| <b>DISP1</b>         | 36.85   | -1.25 | 0.40 | 3.09 | 0.002013977 | 0.022721133 |
| <b>STRADB</b>        | 80.93   | -1.25 | 0.28 | 4.51 | 6.63607E-06 | 0.000408284 |

|                        |        |       |      |      |             |             |
|------------------------|--------|-------|------|------|-------------|-------------|
| <b>SELPLG</b>          | 36.41  | -1.27 | 0.37 | 3.45 | 0.000562561 | 0.010038252 |
| <b>DNAJB9</b>          | 219.89 | -1.27 | 0.27 | 4.74 | 2.17705E-06 | 0.000166644 |
| <b>SLC9A2</b>          | 16.03  | -1.27 | 0.45 | 2.80 | 0.005167454 | 0.040711269 |
| <b>RP11-196G18.22</b>  | 41.56  | -1.27 | 0.32 | 3.97 | 7.19356E-05 | 0.00244527  |
| <b>HEPHL1</b>          | 569.61 | -1.28 | 0.22 | 5.74 | 9.37452E-09 | 1.9288E-06  |
| <b>OVCH2</b>           | 28.82  | -1.29 | 0.37 | 3.51 | 0.000446696 | 0.008815268 |
| <b>BTG4</b>            | 29.73  | -1.29 | 0.38 | 3.36 | 0.000768939 | 0.012566419 |
| <b>RP11-1020M18.10</b> | 109.99 | -1.29 | 0.22 | 5.87 | 4.33041E-09 | 1.05144E-06 |
| <b>PLA2G4C</b>         | 71.89  | -1.29 | 0.27 | 4.72 | 2.37625E-06 | 0.000180502 |
| <b>ECHDC1</b>          | 657.12 | -1.29 | 0.22 | 5.97 | 2.31761E-09 | 6.85055E-07 |
| <b>CYFIP2</b>          | 21.83  | -1.30 | 0.40 | 3.27 | 0.001073978 | 0.015299623 |
| <b>CERKL</b>           | 25.15  | -1.31 | 0.39 | 3.38 | 0.000713863 | 0.011953695 |
| <b>RAB6B</b>           | 83.06  | -1.31 | 0.28 | 4.71 | 2.4891E-06  | 0.000188024 |
| <b>RP11-403A21.1</b>   | 79.28  | -1.31 | 0.27 | 4.89 | 1.00606E-06 | 8.47805E-05 |
| <b>MYO16</b>           | 331.65 | -1.31 | 0.22 | 6.06 | 1.35062E-09 | 4.43346E-07 |
| <b>DIO2</b>            | 22.50  | -1.32 | 0.45 | 2.90 | 0.003775658 | 0.033494554 |
| <b>MOXD1</b>           | 85.44  | -1.32 | 0.26 | 4.99 | 5.99805E-07 | 5.54799E-05 |
| <b>STC2</b>            | 119.68 | -1.32 | 0.23 | 5.65 | 1.60581E-08 | 3.11918E-06 |
| <b>GPC4</b>            | 45.74  | -1.32 | 0.30 | 4.37 | 1.2644E-05  | 0.000679529 |
| <b>IL7</b>             | 66.16  | -1.32 | 0.31 | 4.24 | 2.22125E-05 | 0.001045065 |
| <b>GRIK1</b>           | 13.80  | -1.32 | 0.49 | 2.69 | 0.007148503 | 0.049586225 |
| <b>PTPRR</b>           | 15.57  | -1.32 | 0.48 | 2.75 | 0.005916566 | 0.044274511 |
| <b>IMPG1</b>           | 19.16  | -1.33 | 0.42 | 3.17 | 0.001542175 | 0.019237578 |
| <b>ID4</b>             | 51.04  | -1.33 | 0.29 | 4.56 | 5.05434E-06 | 0.000327944 |
| <b>SULT1E1</b>         | 37.89  | -1.35 | 0.35 | 3.87 | 0.000109477 | 0.003315288 |
| <b>ENO2</b>            | 36.83  | -1.35 | 0.33 | 4.08 | 4.5878E-05  | 0.001827923 |
| <b>APBA1</b>           | 45.52  | -1.35 | 0.34 | 4.02 | 5.70716E-05 | 0.002126035 |
| <b>FN1</b>             | 732.37 | -1.35 | 0.19 | 7.07 | 1.53616E-12 | 1.09932E-09 |
| <b>LANCL1</b>          | 38.30  | -1.36 | 0.39 | 3.50 | 0.000457612 | 0.008927038 |
| <b>IL23A</b>           | 136.77 | -1.38 | 0.23 | 5.95 | 2.70754E-09 | 7.44259E-07 |
| <b>RP1-93H18.7</b>     | 16.47  | -1.38 | 0.44 | 3.13 | 0.001722921 | 0.020676574 |
| <b>CCDC115</b>         | 161.99 | -1.39 | 0.22 | 6.34 | 2.31427E-10 | 8.99061E-08 |
| <b>TMEM217</b>         | 241.21 | -1.39 | 0.18 | 7.56 | 3.93689E-14 | 4.46083E-11 |
| <b>N4BP2L1</b>         | 18.71  | -1.39 | 0.42 | 3.31 | 0.000947901 | 0.014194499 |
| <b>HSD11B1</b>         | 42.67  | -1.40 | 0.31 | 4.43 | 9.28077E-06 | 0.000530213 |
| <b>IL20</b>            | 265.07 | -1.40 | 0.23 | 5.97 | 2.41045E-09 | 6.92087E-07 |
| <b>RP11-443P15.2</b>   | 56.88  | -1.40 | 0.33 | 4.29 | 1.80294E-05 | 0.000885001 |
| <b>CCDC126</b>         | 46.64  | -1.40 | 0.31 | 4.59 | 4.49527E-06 | 0.000303651 |
| <b>RP1-78O14.1</b>     | 20.49  | -1.41 | 0.41 | 3.43 | 0.000603668 | 0.010536678 |
| <b>CAMK4</b>           | 16.19  | -1.41 | 0.49 | 2.88 | 0.003950799 | 0.034172405 |
| <b>PLCL2</b>           | 32.43  | -1.41 | 0.39 | 3.65 | 0.000258057 | 0.006060111 |

|                       |          |       |      |       |             |             |
|-----------------------|----------|-------|------|-------|-------------|-------------|
| <b>SERINC3</b>        | 1189.28  | -1.41 | 0.19 | 7.64  | 2.14103E-14 | 2.80042E-11 |
| <b>RP11-439L18.3</b>  | 15.35    | -1.42 | 0.49 | 2.89  | 0.003910237 | 0.034098918 |
| <b>SOCS3</b>          | 861.48   | -1.43 | 0.31 | 4.59  | 4.48737E-06 | 0.000303651 |
| <b>CXCL5</b>          | 283.89   | -1.43 | 0.28 | 5.16  | 2.48738E-07 | 2.77221E-05 |
| <b>ATPAF1</b>         | 318.40   | -1.46 | 0.20 | 7.32  | 2.5558E-13  | 2.40499E-10 |
| <b>SLC2A10</b>        | 13.52    | -1.46 | 0.48 | 3.04  | 0.002351335 | 0.02483996  |
| <b>RP11-277P12.20</b> | 142.86   | -1.46 | 0.22 | 6.61  | 3.73439E-11 | 1.69225E-08 |
| <b>IGFBP3</b>         | 871.07   | -1.47 | 0.17 | 8.44  | 3.22263E-17 | 5.47726E-14 |
| <b>RP11-96K19.2</b>   | 15.89    | -1.48 | 0.54 | 2.76  | 0.005763752 | 0.04358717  |
| <b>VNN3</b>           | 30.52    | -1.50 | 0.39 | 3.79  | 0.000147738 | 0.004073185 |
| <b>KLHL24</b>         | 111.36   | -1.52 | 0.25 | 6.20  | 5.77507E-10 | 2.12226E-07 |
| <b>ADORA2BP</b>       | 24.02    | -1.53 | 0.39 | 3.96  | 7.56666E-05 | 0.002503256 |
| <b>RP1-28O10.1</b>    | 224.10   | -1.54 | 0.23 | 6.74  | 1.57153E-11 | 8.21852E-09 |
| <b>MIR146A</b>        | 195.64   | -1.54 | 0.29 | 5.33  | 9.99558E-08 | 1.40113E-05 |
| <b>RRAGD</b>          | 52.38    | -1.54 | 0.30 | 5.07  | 4.04332E-07 | 4.13361E-05 |
| <b>RP11-568N6.1</b>   | 29.06    | -1.55 | 0.38 | 4.05  | 5.03006E-05 | 0.001948538 |
| <b>CASP7</b>          | 286.33   | -1.58 | 0.23 | 6.97  | 3.2612E-12  | 2.21712E-09 |
| <b>FAM171B</b>        | 67.39    | -1.59 | 0.28 | 5.74  | 9.34446E-09 | 1.9288E-06  |
| <b>CDKL2</b>          | 19.22    | -1.59 | 0.44 | 3.60  | 0.000323486 | 0.007105713 |
| <b>CADPS2</b>         | 14.06    | -1.61 | 0.52 | 3.10  | 0.001914496 | 0.022026757 |
| <b>REPS2</b>          | 29.16    | -1.62 | 0.35 | 4.57  | 4.78244E-06 | 0.000312629 |
| <b>SERPINE3</b>       | 43.91    | -1.64 | 0.32 | 5.20  | 2.03699E-07 | 2.39948E-05 |
| <b>MSRB3</b>          | 60.95    | -1.65 | 0.32 | 5.23  | 1.69468E-07 | 2.09408E-05 |
| <b>KB-1460A1.5</b>    | 17.99    | -1.66 | 0.47 | 3.50  | 0.000472202 | 0.009017595 |
| <b>TEPP</b>           | 15.98    | -1.67 | 0.46 | 3.60  | 0.000319723 | 0.00703442  |
| <b>TUBA1A</b>         | 535.97   | -1.67 | 0.18 | 9.32  | 1.13575E-20 | 3.86071E-17 |
| <b>MAP1B</b>          | 118.14   | -1.68 | 0.23 | 7.31  | 2.65315E-13 | 2.40499E-10 |
| <b>AC104777.2</b>     | 36.55    | -1.68 | 0.36 | 4.70  | 2.5751E-06  | 0.000193445 |
| <b>SYT14</b>          | 40.15    | -1.72 | 0.33 | 5.23  | 1.70952E-07 | 2.09408E-05 |
| <b>SOX4</b>           | 3302.44  | -1.72 | 0.16 | 11.04 | 2.49378E-28 | 3.3908E-24  |
| <b>AC023115.2</b>     | 14.19    | -1.74 | 0.49 | 3.57  | 0.000363481 | 0.007686239 |
| <b>FZD3</b>           | 107.90   | -1.74 | 0.24 | 7.22  | 5.21551E-13 | 4.23388E-10 |
| <b>S100A12</b>        | 22.42    | -1.74 | 0.42 | 4.20  | 2.64843E-05 | 0.001191025 |
| <b>HAS2</b>           | 15.75    | -1.77 | 0.48 | 3.73  | 0.00018957  | 0.004845076 |
| <b>VIM</b>            | 471.24   | -1.78 | 0.17 | 10.51 | 7.59215E-26 | 5.16152E-22 |
| <b>NFKBIZ</b>         | 11511.68 | -1.78 | 0.19 | 9.23  | 2.60778E-20 | 7.09159E-17 |
| <b>KCNJ5</b>          | 38.35    | -1.82 | 0.35 | 5.27  | 1.39448E-07 | 1.80579E-05 |
| <b>POSTN</b>          | 29.78    | -1.83 | 0.53 | 3.47  | 0.000526519 | 0.009622418 |
| <b>SPRR2A</b>         | 433.82   | -1.84 | 0.27 | 6.80  | 1.03889E-11 | 5.88574E-09 |
| <b>BVES</b>           | 35.85    | -1.89 | 0.36 | 5.23  | 1.6806E-07  | 2.09408E-05 |
| <b>MBD5</b>           | 562.33   | -1.89 | 0.21 | 9.06  | 1.33897E-19 | 3.03432E-16 |

|                     |        |       |      |      |             |             |
|---------------------|--------|-------|------|------|-------------|-------------|
| <b>LSMEM1</b>       | 28.35  | -1.89 | 0.45 | 4.21 | 2.50722E-05 | 0.001140155 |
| <b>CXCL6</b>        | 44.81  | -1.90 | 0.34 | 5.54 | 3.02475E-08 | 5.63391E-06 |
| <b>SPRR3</b>        | 281.51 | -1.92 | 0.28 | 6.93 | 4.32803E-12 | 2.80229E-09 |
| <b>TLR3</b>         | 58.90  | -1.95 | 0.31 | 6.23 | 4.57619E-10 | 1.7284E-07  |
| <b>RP11-79H23.3</b> | 117.66 | -1.96 | 0.24 | 8.23 | 1.92715E-16 | 2.91149E-13 |
| <b>IL16</b>         | 141.60 | -1.98 | 0.22 | 9.02 | 1.8425E-19  | 3.57892E-16 |
| <b>UCHL1</b>        | 25.30  | -2.06 | 0.39 | 5.24 | 1.63328E-07 | 2.05627E-05 |
| <b>SERPINB4</b>     | 17.44  | -2.71 | 0.52 | 5.21 | 1.89325E-07 | 2.2781E-05  |
| <b>KIAA1683</b>     | 14.82  | -3.01 | 0.63 | 4.80 | 1.58728E-06 | 0.000124861 |

**Table S2. List of genes regulated by *NFKBIZ* knockdown in primary KC after 24 h of IL-36 $\alpha$  treatment**

|                      | Base Mean | log2 fold Change | lfcSE | stat  | P value     | P value adj. |
|----------------------|-----------|------------------|-------|-------|-------------|--------------|
| <b>EIF3CL</b>        | 90.67     | 4.06             | 1.13  | -3.59 | 0.000331714 | 0.008152368  |
| <b>KRT24</b>         | 31.08     | 2.91             | 0.43  | -6.75 | 1.47482E-11 | 9.70012E-09  |
| <b>CAPN8</b>         | 61.71     | 2.09             | 0.29  | -7.25 | 4.10347E-13 | 2.983E-10    |
| <b>FAM198B</b>       | 44.03     | 1.88             | 0.31  | -5.99 | 2.03957E-09 | 5.3152E-07   |
| <b>SLITRK6</b>       | 45.18     | 1.75             | 0.33  | -5.33 | 1.00299E-07 | 1.57424E-05  |
| <b>STXBP6</b>        | 13.61     | 1.73             | 0.52  | -3.29 | 0.00099468  | 0.017750032  |
| <b>LIPH</b>          | 29.41     | 1.64             | 0.36  | -4.58 | 4.75827E-06 | 0.000360893  |
| <b>NTSR1</b>         | 78.88     | 1.52             | 0.25  | -6.01 | 1.90292E-09 | 5.1979E-07   |
| <b>STAC</b>          | 26.41     | 1.44             | 0.40  | -3.59 | 0.000333048 | 0.008156136  |
| <b>LINC00887</b>     | 20.71     | 1.41             | 0.41  | -3.41 | 0.000657254 | 0.013310848  |
| <b>MYH15</b>         | 30.14     | 1.36             | 0.34  | -3.97 | 7.13402E-05 | 0.002667673  |
| <b>RIC3</b>          | 117.85    | 1.36             | 0.21  | -6.38 | 1.72605E-10 | 8.13769E-08  |
| <b>DMRTA1</b>        | 23.41     | 1.30             | 0.40  | -3.29 | 0.000992507 | 0.017734168  |
| <b>DCN</b>           | 17.44     | 1.27             | 0.45  | -2.83 | 0.004682933 | 0.049665678  |
| <b>SCML2</b>         | 92.89     | 1.27             | 0.24  | -5.22 | 1.74412E-07 | 2.43331E-05  |
| <b>ITGBL1</b>        | 28.56     | 1.27             | 0.38  | -3.33 | 0.000857423 | 0.015982091  |
| <b>RP11-298I3.4</b>  | 17.83     | 1.24             | 0.43  | -2.88 | 0.004010271 | 0.044886435  |
| <b>HSPD1P6</b>       | 34.86     | 1.22             | 0.32  | -3.83 | 0.000128662 | 0.004094669  |
| <b>PHACTR3</b>       | 60.59     | 1.22             | 0.27  | -4.51 | 6.62191E-06 | 0.000445448  |
| <b>DIRAS1</b>        | 33.77     | 1.16             | 0.40  | -2.91 | 0.00362251  | 0.042080834  |
| <b>SDPR</b>          | 243.29    | 1.16             | 0.21  | -5.58 | 2.4665E-08  | 5.07779E-06  |
| <b>GPR110</b>        | 497.93    | 1.15             | 0.18  | -6.43 | 1.27104E-10 | 6.5021E-08   |
| <b>SYT8</b>          | 268.62    | 1.14             | 0.21  | -5.43 | 5.61872E-08 | 9.70073E-06  |
| <b>MAP7D2</b>        | 48.49     | 1.12             | 0.28  | -3.97 | 7.26778E-05 | 0.002691222  |
| <b>ABCC2</b>         | 75.47     | 1.11             | 0.24  | -4.60 | 4.18993E-06 | 0.000326957  |
| <b>LINC00589</b>     | 55.07     | 1.08             | 0.28  | -3.91 | 9.18453E-05 | 0.003187356  |
| <b>SFTA1P</b>        | 58.81     | 1.08             | 0.28  | -3.82 | 0.000130854 | 0.00414531   |
| <b>PTGS1</b>         | 511.23    | 1.07             | 0.17  | -6.19 | 5.91133E-10 | 2.04118E-07  |
| <b>CTD-2620I22.1</b> | 33.05     | 1.06             | 0.36  | -2.98 | 0.002896516 | 0.035624827  |
| <b>SMOC1</b>         | 366.80    | 1.05             | 0.20  | -5.26 | 1.41323E-07 | 2.07655E-05  |
| <b>RGS2</b>          | 307.53    | 1.04             | 0.20  | -5.24 | 1.61151E-07 | 2.31855E-05  |
| <b>PRUNE2</b>        | 26.42     | 1.04             | 0.36  | -2.90 | 0.003700374 | 0.042733745  |
| <b>SPA17</b>         | 45.81     | 1.04             | 0.29  | -3.61 | 0.000308974 | 0.007787498  |
| <b>ZNF583</b>        | 58.68     | 1.04             | 0.26  | -4.00 | 6.46924E-05 | 0.002495898  |
| <b>MYEF2</b>         | 71.56     | 1.02             | 0.25  | -4.07 | 4.72542E-05 | 0.001977803  |
| <b>ZNF239</b>        | 91.37     | 1.02             | 0.23  | -4.41 | 1.04794E-05 | 0.000637625  |
| <b>LDHBP2</b>        | 90.21     | 1.01             | 0.24  | -4.21 | 2.59898E-05 | 0.001277475  |

|                       |          |       |      |       |             |             |
|-----------------------|----------|-------|------|-------|-------------|-------------|
| <b>AC073254.1</b>     | 34.29    | 1.01  | 0.34 | -2.95 | 0.003227682 | 0.038665004 |
| <b>PLEKHA7</b>        | 89.51    | 1.01  | 0.25 | -3.96 | 7.50795E-05 | 0.002750658 |
| <b>LINC00704</b>      | 101.10   | 1.01  | 0.22 | -4.48 | 7.35763E-06 | 0.000480401 |
| <b>HS3ST2</b>         | 148.52   | 1.01  | 0.22 | -4.63 | 3.69191E-06 | 0.000298203 |
| <b>SLC16A14</b>       | 222.42   | 1.00  | 0.20 | -4.91 | 8.93763E-07 | 9.4234E-05  |
| <b>FAM189A2</b>       | 62.36    | -1.00 | 0.28 | 3.61  | 0.000300926 | 0.007616219 |
| <b>SLIT3</b>          | 230.67   | -1.00 | 0.22 | 4.48  | 7.51757E-06 | 0.000482943 |
| <b>CFD</b>            | 43.13    | -1.01 | 0.31 | 3.30  | 0.000980138 | 0.017581391 |
| <b>LY6D</b>           | 730.05   | -1.01 | 0.16 | 6.28  | 3.38131E-10 | 1.37361E-07 |
| <b>BRSK1</b>          | 43.25    | -1.01 | 0.31 | 3.30  | 0.000973688 | 0.017511168 |
| <b>HOXC13-AS</b>      | 55.52    | -1.01 | 0.26 | 3.84  | 0.000124073 | 0.00398533  |
| <b>GYLTL1B</b>        | 1905.03  | -1.01 | 0.22 | 4.68  | 2.87195E-06 | 0.000241875 |
| <b>HSPG2</b>          | 11564.52 | -1.01 | 0.27 | 3.73  | 0.000187734 | 0.005368489 |
| <b>POU3F1</b>         | 92.69    | -1.01 | 0.26 | 3.84  | 0.000121601 | 0.003938646 |
| <b>KCTD11</b>         | 149.38   | -1.01 | 0.27 | 3.77  | 0.000160137 | 0.004805191 |
| <b>PGLYRP4</b>        | 148.05   | -1.01 | 0.22 | 4.70  | 2.54566E-06 | 0.000220042 |
| <b>PCOLCE</b>         | 83.00    | -1.01 | 0.24 | 4.16  | 3.2392E-05  | 0.001511481 |
| <b>TYMP</b>           | 4581.80  | -1.01 | 0.22 | 4.52  | 6.30653E-06 | 0.000435529 |
| <b>REEP2</b>          | 76.79    | -1.02 | 0.27 | 3.78  | 0.000159338 | 0.004802299 |
| <b>RP11-178L8.4</b>   | 76.41    | -1.02 | 0.31 | 3.30  | 0.000950581 | 0.01723022  |
| <b>SDK2</b>           | 869.43   | -1.02 | 0.24 | 4.21  | 2.51133E-05 | 0.001247714 |
| <b>SMTNL1</b>         | 26.72    | -1.02 | 0.36 | 2.85  | 0.004327679 | 0.047326918 |
| <b>HELZ2</b>          | 5813.25  | -1.02 | 0.25 | 4.17  | 3.10266E-05 | 0.001462589 |
| <b>FADS3</b>          | 1037.55  | -1.03 | 0.19 | 5.45  | 5.12252E-08 | 9.07081E-06 |
| <b>C3</b>             | 465.87   | -1.03 | 0.16 | 6.53  | 6.68566E-11 | 3.69369E-08 |
| <b>RP11-540O11.1</b>  | 37.41    | -1.03 | 0.33 | 3.11  | 0.001885911 | 0.026909295 |
| <b>YPEL3</b>          | 660.07   | -1.03 | 0.20 | 5.10  | 3.33169E-07 | 4.0015E-05  |
| <b>PIK3IP1</b>        | 498.63   | -1.03 | 0.17 | 6.15  | 7.83048E-10 | 2.35119E-07 |
| <b>CRAT</b>           | 241.10   | -1.04 | 0.22 | 4.70  | 2.549E-06   | 0.000220042 |
| <b>ADAMTS13</b>       | 104.37   | -1.04 | 0.24 | 4.26  | 2.08188E-05 | 0.001085092 |
| <b>TAPBPL</b>         | 180.28   | -1.04 | 0.21 | 4.93  | 8.32423E-07 | 8.84417E-05 |
| <b>COASY</b>          | 2348.99  | -1.04 | 0.23 | 4.53  | 5.87339E-06 | 0.000411793 |
| <b>ANKRD34A</b>       | 42.51    | -1.04 | 0.30 | 3.49  | 0.000482208 | 0.010555093 |
| <b>FZD2</b>           | 82.43    | -1.05 | 0.32 | 3.33  | 0.000875477 | 0.0162528   |
| <b>MTRNR2L10</b>      | 55.86    | -1.05 | 0.29 | 3.67  | 0.000243039 | 0.006518172 |
| <b>EFNB3</b>          | 66.44    | -1.05 | 0.26 | 4.11  | 3.99571E-05 | 0.001768869 |
| <b>DMTN</b>           | 222.27   | -1.05 | 0.26 | 4.00  | 6.31471E-05 | 0.002449964 |
| <b>MT-TY</b>          | 125.52   | -1.05 | 0.23 | 4.59  | 4.36565E-06 | 0.000338755 |
| <b>CPNE2</b>          | 431.18   | -1.05 | 0.19 | 5.41  | 6.30583E-08 | 1.04935E-05 |
| <b>RP11-277P12.20</b> | 112.18   | -1.06 | 0.23 | 4.61  | 3.9345E-06  | 0.000311937 |
| <b>ENG</b>            | 106.24   | -1.06 | 0.29 | 3.68  | 0.000234302 | 0.006357919 |

|                       |         |       |      |      |             |             |
|-----------------------|---------|-------|------|------|-------------|-------------|
| <b>LGALS9B</b>        | 181.91  | -1.06 | 0.21 | 4.99 | 5.90899E-07 | 6.63537E-05 |
| <b>SNRNP27</b>        | 120.27  | -1.07 | 0.21 | 4.97 | 6.70389E-07 | 7.29087E-05 |
| <b>SOCS2-AS1</b>      | 34.52   | -1.07 | 0.35 | 3.10 | 0.001947527 | 0.027532491 |
| <b>RP11-1212A22.1</b> | 57.91   | -1.07 | 0.32 | 3.36 | 0.000787142 | 0.015100013 |
| <b>GPR37</b>          | 29.64   | -1.07 | 0.35 | 3.09 | 0.001989725 | 0.027928943 |
| <b>C6orf1</b>         | 1217.75 | -1.07 | 0.23 | 4.76 | 1.94035E-06 | 0.000182314 |
| <b>HAPLN3</b>         | 266.92  | -1.07 | 0.23 | 4.70 | 2.5683E-06  | 0.000220332 |
| <b>SCN4B</b>          | 707.59  | -1.08 | 0.17 | 6.15 | 7.68511E-10 | 2.35119E-07 |
| <b>LINC01023</b>      | 23.73   | -1.08 | 0.37 | 2.92 | 0.003497639 | 0.04097488  |
| <b>BVES</b>           | 46.92   | -1.08 | 0.30 | 3.57 | 0.000355435 | 0.008582637 |
| <b>FAM171A2</b>       | 88.86   | -1.08 | 0.34 | 3.18 | 0.001468619 | 0.022740549 |
| <b>RHBDL2</b>         | 24.91   | -1.08 | 0.38 | 2.87 | 0.004165372 | 0.046210537 |
| <b>SERINC3</b>        | 1585.24 | -1.08 | 0.16 | 6.67 | 2.6143E-11  | 1.6413E-08  |
| <b>FKBP10</b>         | 210.72  | -1.09 | 0.25 | 4.43 | 9.53804E-06 | 0.000588122 |
| <b>CORO1A</b>         | 214.25  | -1.09 | 0.23 | 4.73 | 2.2957E-06  | 0.000207647 |
| <b>NYAP1</b>          | 89.84   | -1.09 | 0.30 | 3.65 | 0.000265543 | 0.006894125 |
| <b>LGALS7B</b>        | 931.50  | -1.09 | 0.26 | 4.17 | 3.09335E-05 | 0.001462589 |
| <b>FAM219A</b>        | 512.66  | -1.09 | 0.24 | 4.56 | 5.2364E-06  | 0.000379077 |
| <b>RAB1B</b>          | 33.70   | -1.09 | 0.37 | 2.96 | 0.003037162 | 0.036959723 |
| <b>LHX5</b>           | 28.44   | -1.10 | 0.35 | 3.13 | 0.001733432 | 0.025606591 |
| <b>CRIP2</b>          | 699.27  | -1.10 | 0.23 | 4.72 | 2.36531E-06 | 0.000210772 |
| <b>RAB6B</b>          | 86.40   | -1.10 | 0.25 | 4.38 | 1.17532E-05 | 0.000687979 |
| <b>COL5A1</b>         | 245.29  | -1.11 | 0.25 | 4.35 | 1.3793E-05  | 0.000783986 |
| <b>RHOQ</b>           | 49.83   | -1.11 | 0.29 | 3.84 | 0.000121449 | 0.003938646 |
| <b>SYDE1</b>          | 391.62  | -1.11 | 0.25 | 4.36 | 1.29345E-05 | 0.000744382 |
| <b>HOXC4</b>          | 87.04   | -1.11 | 0.26 | 4.29 | 1.80533E-05 | 0.000977852 |
| <b>ADAMTS4</b>        | 30.04   | -1.11 | 0.38 | 2.97 | 0.003025565 | 0.03685106  |
| <b>FMNL1</b>          | 130.10  | -1.11 | 0.25 | 4.53 | 5.79198E-06 | 0.000408157 |
| <b>CCDC115</b>        | 287.21  | -1.11 | 0.18 | 6.26 | 3.95861E-10 | 1.51879E-07 |
| <b>MARCKSL1</b>       | 118.24  | -1.12 | 0.30 | 3.76 | 0.000171446 | 0.005049068 |
| <b>TUBA1A</b>         | 624.18  | -1.12 | 0.18 | 6.18 | 6.29244E-10 | 2.09222E-07 |
| <b>PODNL1</b>         | 31.93   | -1.12 | 0.36 | 3.09 | 0.001986981 | 0.027918808 |
| <b>LIF</b>            | 184.44  | -1.12 | 0.25 | 4.55 | 5.26953E-06 | 0.000379077 |
| <b>MAP3K11</b>        | 1824.36 | -1.12 | 0.24 | 4.66 | 3.09117E-06 | 0.00025566  |
| <b>ACSS1</b>          | 228.69  | -1.12 | 0.24 | 4.61 | 4.04233E-06 | 0.000317231 |
| <b>SALL4</b>          | 32.93   | -1.12 | 0.35 | 3.22 | 0.001290772 | 0.020926104 |
| <b>CENPQ</b>          | 158.67  | -1.13 | 0.21 | 5.34 | 9.08296E-08 | 1.442E-05   |
| <b>ACBD4</b>          | 285.67  | -1.13 | 0.21 | 5.39 | 6.99621E-08 | 1.13684E-05 |
| <b>PLXND1</b>         | 91.30   | -1.13 | 0.27 | 4.25 | 2.10833E-05 | 0.001094747 |
| <b>SLC16A8</b>        | 25.49   | -1.14 | 0.39 | 2.94 | 0.003264253 | 0.038969547 |
| <b>NXPH4</b>          | 95.49   | -1.14 | 0.30 | 3.73 | 0.000189537 | 0.005397698 |

|                      |          |       |      |      |             |             |
|----------------------|----------|-------|------|------|-------------|-------------|
| <b>FAM214B</b>       | 1216.79  | -1.14 | 0.22 | 5.18 | 2.21473E-07 | 2.94133E-05 |
| <b>SP6</b>           | 429.30   | -1.15 | 0.24 | 4.73 | 2.26318E-06 | 0.000207647 |
| <b>SERPING1</b>      | 400.41   | -1.15 | 0.21 | 5.54 | 3.03878E-08 | 5.91149E-06 |
| <b>SPRED3</b>        | 43.04    | -1.15 | 0.33 | 3.50 | 0.000460265 | 0.010206017 |
| <b>BLMH</b>          | 387.27   | -1.15 | 0.17 | 6.65 | 2.99076E-11 | 1.79601E-08 |
| <b>THBS2</b>         | 802.88   | -1.15 | 0.18 | 6.36 | 2.03829E-10 | 9.08158E-08 |
| <b>CCNJL</b>         | 26.69    | -1.16 | 0.37 | 3.11 | 0.001870603 | 0.02680162  |
| <b>CTD-2020K17.1</b> | 26.53    | -1.16 | 0.36 | 3.22 | 0.001270874 | 0.020748591 |
| <b>SCARB1</b>        | 2991.83  | -1.16 | 0.23 | 5.01 | 5.38841E-07 | 6.15081E-05 |
| <b>FN1</b>           | 304.07   | -1.16 | 0.18 | 6.38 | 1.76753E-10 | 8.13769E-08 |
| <b>TMEM132A</b>      | 3354.91  | -1.16 | 0.23 | 4.97 | 6.69016E-07 | 7.29087E-05 |
| <b>GDPD5</b>         | 162.98   | -1.16 | 0.26 | 4.54 | 5.69741E-06 | 0.000403552 |
| <b>TMEM191A</b>      | 68.05    | -1.17 | 0.34 | 3.48 | 0.000498525 | 0.010790008 |
| <b>SYNPO</b>         | 2585.17  | -1.17 | 0.24 | 4.88 | 1.04271E-06 | 0.000108286 |
| <b>NOTCH4</b>        | 35.04    | -1.17 | 0.36 | 3.30 | 0.000967345 | 0.017462712 |
| <b>ACE</b>           | 24.07    | -1.18 | 0.40 | 2.92 | 0.003480061 | 0.040872967 |
| <b>HUNK</b>          | 27.10    | -1.18 | 0.37 | 3.19 | 0.001433596 | 0.022348565 |
| <b>SV2A</b>          | 132.35   | -1.18 | 0.25 | 4.72 | 2.39885E-06 | 0.00021239  |
| <b>GPAT2</b>         | 63.95    | -1.19 | 0.30 | 3.93 | 8.63229E-05 | 0.003065018 |
| <b>IL20</b>          | 56.19    | -1.19 | 0.32 | 3.76 | 0.000166692 | 0.004956471 |
| <b>FTH1P8</b>        | 23.31    | -1.19 | 0.39 | 3.06 | 0.002214819 | 0.02984495  |
| <b>SLC17A9</b>       | 80.11    | -1.19 | 0.25 | 4.69 | 2.7174E-06  | 0.000230262 |
| <b>VWA7</b>          | 27.89    | -1.19 | 0.37 | 3.27 | 0.001079926 | 0.018668253 |
| <b>APOE</b>          | 748.01   | -1.20 | 0.22 | 5.52 | 3.35329E-08 | 6.25886E-06 |
| <b>CYP27A1</b>       | 78.85    | -1.20 | 0.32 | 3.71 | 0.000209098 | 0.005846266 |
| <b>SIPA1</b>         | 656.02   | -1.20 | 0.23 | 5.14 | 2.70849E-07 | 3.37024E-05 |
| <b>BST2</b>          | 197.93   | -1.20 | 0.19 | 6.35 | 2.18371E-10 | 9.42544E-08 |
| <b>PPP1R18</b>       | 4297.35  | -1.20 | 0.23 | 5.28 | 1.26839E-07 | 1.92516E-05 |
| <b>PCSK9</b>         | 11804.14 | -1.21 | 0.22 | 5.42 | 6.06306E-08 | 1.02993E-05 |
| <b>TMCC2</b>         | 75.65    | -1.21 | 0.29 | 4.23 | 2.38766E-05 | 0.001199215 |
| <b>SLC39A2</b>       | 19.35    | -1.21 | 0.41 | 2.95 | 0.003220708 | 0.038614945 |
| <b>POU2F2</b>        | 1307.38  | -1.22 | 0.19 | 6.25 | 4.16135E-10 | 1.55342E-07 |
| <b>SPNS2</b>         | 543.97   | -1.22 | 0.23 | 5.23 | 1.70651E-07 | 2.40513E-05 |
| <b>GPR68</b>         | 577.04   | -1.22 | 0.20 | 6.03 | 1.64512E-09 | 4.73383E-07 |
| <b>MAP1B</b>         | 410.31   | -1.22 | 0.19 | 6.48 | 9.13939E-11 | 4.85512E-08 |
| <b>CAPS</b>          | 33.88    | -1.22 | 0.37 | 3.33 | 0.000858749 | 0.015985237 |
| <b>C1R</b>           | 173.34   | -1.22 | 0.20 | 6.20 | 5.65456E-10 | 2.00258E-07 |
| <b>JDP2</b>          | 617.13   | -1.22 | 0.18 | 6.78 | 1.18876E-11 | 8.20959E-09 |
| <b>CXCL16</b>        | 1478.53  | -1.23 | 0.23 | 5.45 | 4.93629E-08 | 8.85455E-06 |
| <b>PLXNA3</b>        | 1190.72  | -1.23 | 0.22 | 5.47 | 4.47546E-08 | 8.13356E-06 |
| <b>GS1-393G12.12</b> | 26.33    | -1.24 | 0.41 | 3.00 | 0.002693966 | 0.034136756 |

|                      |          |       |      |      |             |             |
|----------------------|----------|-------|------|------|-------------|-------------|
| <b>KRT16P2</b>       | 49.62    | -1.24 | 0.29 | 4.23 | 2.30216E-05 | 0.001169025 |
| <b>CSPG4</b>         | 501.37   | -1.24 | 0.26 | 4.72 | 2.32342E-06 | 0.000208383 |
| <b>SCAMP5</b>        | 42.71    | -1.25 | 0.38 | 3.32 | 0.000915025 | 0.016783973 |
| <b>ABCC10</b>        | 1243.27  | -1.25 | 0.23 | 5.52 | 3.3161E-08  | 6.25886E-06 |
| <b>ACO2</b>          | 1739.56  | -1.25 | 0.17 | 7.53 | 5.18035E-14 | 5.11078E-11 |
| <b>PAMR1</b>         | 74.53    | -1.26 | 0.27 | 4.69 | 2.71146E-06 | 0.000230262 |
| <b>FAM195B</b>       | 32.91    | -1.26 | 0.39 | 3.25 | 0.001160528 | 0.019511564 |
| <b>C6orf15</b>       | 43.56    | -1.26 | 0.33 | 3.82 | 0.000132048 | 0.004160174 |
| <b>S100A8</b>        | 8630.75  | -1.27 | 0.22 | 5.77 | 7.97492E-09 | 1.85451E-06 |
| <b>GPR173</b>        | 31.34    | -1.27 | 0.35 | 3.58 | 0.000346392 | 0.008438046 |
| <b>TXNIP</b>         | 3456.35  | -1.27 | 0.24 | 5.29 | 1.24831E-07 | 1.91574E-05 |
| <b>HEPHL1</b>        | 3533.63  | -1.27 | 0.21 | 6.17 | 6.80847E-10 | 2.13724E-07 |
| <b>OSBPL7</b>        | 212.33   | -1.27 | 0.22 | 5.72 | 1.08056E-08 | 2.40721E-06 |
| <b>ADCY4</b>         | 34.53    | -1.28 | 0.34 | 3.74 | 0.000183712 | 0.005308437 |
| <b>SEZ6L2</b>        | 403.34   | -1.28 | 0.25 | 5.13 | 2.93584E-07 | 3.62051E-05 |
| <b>IL23A</b>         | 73.48    | -1.28 | 0.25 | 5.16 | 2.47566E-07 | 3.14851E-05 |
| <b>FCHO1</b>         | 211.02   | -1.29 | 0.26 | 4.96 | 7.11591E-07 | 7.67851E-05 |
| <b>ARC</b>           | 33.63    | -1.29 | 0.36 | 3.55 | 0.000380604 | 0.009007532 |
| <b>KAL1</b>          | 83.06    | -1.29 | 0.26 | 4.94 | 7.9037E-07  | 8.46247E-05 |
| <b>TSPO</b>          | 8371.87  | -1.29 | 0.25 | 5.18 | 2.18777E-07 | 2.93374E-05 |
| <b>TNS1</b>          | 111.45   | -1.29 | 0.30 | 4.26 | 2.07814E-05 | 0.001085092 |
| <b>TUBB3</b>         | 1857.49  | -1.29 | 0.22 | 5.84 | 5.14911E-09 | 1.24771E-06 |
| <b>PANX2</b>         | 73.24    | -1.30 | 0.27 | 4.84 | 1.32989E-06 | 0.000133554 |
| <b>RP11-400F19.8</b> | 21.40    | -1.30 | 0.45 | 2.92 | 0.003516065 | 0.041155837 |
| <b>SOCS3</b>         | 157.09   | -1.30 | 0.26 | 5.03 | 4.82062E-07 | 5.54853E-05 |
| <b>AC004463.6</b>    | 22.13    | -1.30 | 0.41 | 3.20 | 0.001362287 | 0.021577873 |
| <b>CADPS2</b>        | 17.83    | -1.30 | 0.46 | 2.84 | 0.004443628 | 0.048185798 |
| <b>TMEM92</b>        | 124.71   | -1.31 | 0.24 | 5.52 | 3.33742E-08 | 6.25886E-06 |
| <b>S100A9</b>        | 15585.29 | -1.33 | 0.21 | 6.17 | 6.69343E-10 | 2.13724E-07 |
| <b>NKX3-1</b>        | 20.77    | -1.33 | 0.42 | 3.16 | 0.001559432 | 0.023879019 |
| <b>SLC43A2</b>       | 569.07   | -1.33 | 0.26 | 5.17 | 2.35661E-07 | 3.07071E-05 |
| <b>LRR3</b>          | 171.66   | -1.33 | 0.26 | 5.07 | 3.91625E-07 | 4.62318E-05 |
| <b>SAMD14</b>        | 18.99    | -1.34 | 0.43 | 3.11 | 0.001880611 | 0.026909295 |
| <b>ZMYND15</b>       | 46.45    | -1.36 | 0.30 | 4.48 | 7.6302E-06  | 0.000487909 |
| <b>C1QTNF1</b>       | 1349.56  | -1.39 | 0.22 | 6.34 | 2.31811E-10 | 9.70235E-08 |
| <b>SLC16A11</b>      | 38.07    | -1.39 | 0.36 | 3.90 | 9.44046E-05 | 0.003243572 |
| <b>SYNGR3</b>        | 28.03    | -1.39 | 0.39 | 3.60 | 0.000313323 | 0.007868399 |
| <b>CGB7</b>          | 36.92    | -1.40 | 0.32 | 4.31 | 1.64631E-05 | 0.000902332 |
| <b>GPC4</b>          | 56.32    | -1.40 | 0.30 | 4.67 | 2.94823E-06 | 0.000246793 |
| <b>TUBB2A</b>        | 355.53   | -1.40 | 0.19 | 7.33 | 2.23646E-13 | 1.78579E-10 |
| <b>CSF2</b>          | 39.14    | -1.41 | 0.32 | 4.37 | 1.25808E-05 | 0.000727057 |

|                     |         |       |      |       |             |             |
|---------------------|---------|-------|------|-------|-------------|-------------|
| <b>IGFBP6</b>       | 436.68  | -1.42 | 0.23 | 6.20  | 5.552E-10   | 2.00258E-07 |
| <b>IL36G</b>        | 383.12  | -1.42 | 0.19 | 7.37  | 1.7061E-13  | 1.47279E-10 |
| <b>ENO2</b>         | 79.49   | -1.43 | 0.28 | 5.16  | 2.44598E-07 | 3.14851E-05 |
| <b>LGALS7</b>       | 587.76  | -1.43 | 0.27 | 5.25  | 1.48167E-07 | 2.15419E-05 |
| <b>NACAD</b>        | 118.79  | -1.43 | 0.26 | 5.43  | 5.52136E-08 | 9.6533E-06  |
| <b>S100A12</b>      | 54.35   | -1.44 | 0.36 | 4.00  | 6.44007E-05 | 0.002491602 |
| <b>C19orf57</b>     | 18.77   | -1.45 | 0.46 | 3.17  | 0.001531504 | 0.023608405 |
| <b>S100A7</b>       | 326.28  | -1.45 | 0.18 | 7.88  | 3.29226E-15 | 4.54727E-12 |
| <b>CORO2B</b>       | 53.56   | -1.45 | 0.30 | 4.83  | 1.38393E-06 | 0.000135567 |
| <b>AEBP1</b>        | 212.84  | -1.46 | 0.25 | 5.96  | 2.59318E-09 | 6.63279E-07 |
| <b>APBA1</b>        | 34.79   | -1.46 | 0.35 | 4.17  | 3.08801E-05 | 0.001462589 |
| <b>PLA2G2F</b>      | 69.26   | -1.47 | 0.27 | 5.50  | 3.75617E-08 | 6.91736E-06 |
| <b>IL24</b>         | 170.77  | -1.48 | 0.19 | 7.67  | 1.7029E-14  | 1.96004E-11 |
| <b>PRSS22</b>       | 410.89  | -1.48 | 0.19 | 7.68  | 1.62535E-14 | 1.96004E-11 |
| <b>UCHL1</b>        | 35.97   | -1.49 | 0.33 | 4.50  | 6.8193E-06  | 0.000455015 |
| <b>LITAF</b>        | 2448.79 | -1.50 | 0.14 | 10.35 | 4.21026E-25 | 1.9384E-21  |
| <b>RP13-582O9.5</b> | 28.92   | -1.50 | 0.37 | 4.08  | 4.55133E-05 | 0.001934244 |
| <b>CNTNAP1</b>      | 15.56   | -1.50 | 0.50 | 3.03  | 0.002465369 | 0.031943415 |
| <b>KCND1</b>        | 80.61   | -1.52 | 0.25 | 6.00  | 1.91929E-09 | 5.1979E-07  |
| <b>SPRR3</b>        | 227.33  | -1.52 | 0.19 | 8.23  | 1.85835E-16 | 3.20845E-13 |
| <b>LRRC3DN</b>      | 137.36  | -1.54 | 0.27 | 5.77  | 8.0561E-09  | 1.85451E-06 |
| <b>JAK3</b>         | 63.63   | -1.54 | 0.30 | 5.11  | 3.23868E-07 | 3.92392E-05 |
| <b>AIM1</b>         | 3690.16 | -1.55 | 0.15 | 10.28 | 9.04763E-25 | 3.12415E-21 |
| <b>DERL3</b>        | 126.08  | -1.55 | 0.26 | 6.02  | 1.77037E-09 | 4.99027E-07 |
| <b>PDZK1IP1</b>     | 566.74  | -1.56 | 0.18 | 8.60  | 7.92637E-18 | 1.82465E-14 |
| <b>ELF3</b>         | 19.38   | -1.57 | 0.45 | 3.52  | 0.000437428 | 0.00990547  |
| <b>MIR429</b>       | 16.87   | -1.57 | 0.48 | 3.25  | 0.001173527 | 0.019646978 |
| <b>VNN3</b>         | 34.10   | -1.59 | 0.35 | 4.48  | 7.42522E-06 | 0.000481489 |
| <b>hsa-mir-1199</b> | 26.95   | -1.59 | 0.41 | 3.88  | 0.000103197 | 0.003468021 |
| <b>KAZALD1</b>      | 15.82   | -1.59 | 0.48 | 3.35  | 0.000818648 | 0.015485891 |
| <b>KCNJ5</b>        | 195.48  | -1.60 | 0.21 | 7.65  | 1.97443E-14 | 2.09775E-11 |
| <b>DMBT1</b>        | 32.38   | -1.61 | 0.37 | 4.33  | 1.51885E-05 | 0.000842505 |
| <b>IGFBP4</b>       | 928.73  | -1.62 | 0.25 | 6.58  | 4.58119E-11 | 2.63647E-08 |
| <b>SLC22A31</b>     | 38.39   | -1.65 | 0.33 | 4.99  | 6.02067E-07 | 6.70625E-05 |
| <b>SPRR2B</b>       | 304.78  | -1.66 | 0.20 | 8.40  | 4.64465E-17 | 9.16455E-14 |
| <b>TEPP</b>         | 62.31   | -1.66 | 0.28 | 6.00  | 1.97445E-09 | 5.24443E-07 |
| <b>CXCL6</b>        | 31.24   | -1.67 | 0.36 | 4.59  | 4.43058E-06 | 0.000341872 |
| <b>GLI1</b>         | 29.92   | -1.67 | 0.41 | 4.07  | 4.78121E-05 | 0.001983125 |
| <b>CNTD2</b>        | 23.15   | -1.71 | 0.43 | 4.01  | 6.02711E-05 | 0.002371695 |
| <b>LCN2</b>         | 3457.99 | -1.72 | 0.16 | 10.64 | 1.94804E-26 | 1.34532E-22 |
| <b>KRT16P5</b>      | 79.38   | -1.72 | 0.37 | 4.62  | 3.85974E-06 | 0.000308155 |

|                 |         |       |      |       |             |             |
|-----------------|---------|-------|------|-------|-------------|-------------|
| <b>ADAMTS15</b> | 29.23   | -1.72 | 0.41 | 4.24  | 2.22643E-05 | 0.001138943 |
| <b>FAM131C</b>  | 26.24   | -1.72 | 0.40 | 4.28  | 1.87246E-05 | 0.001002417 |
| <b>APH1A</b>    | 3229.29 | -1.79 | 0.22 | 8.14  | 4.06748E-16 | 6.24222E-13 |
| <b>SPRR2A</b>   | 1110.16 | -1.82 | 0.20 | 9.23  | 2.59764E-20 | 7.17572E-17 |
| <b>EBF4</b>     | 21.39   | -1.83 | 0.47 | 3.91  | 9.40591E-05 | 0.003243572 |
| <b>HAS2</b>     | 17.73   | -1.88 | 0.47 | 4.04  | 5.26456E-05 | 0.002126144 |
| <b>ATP13A2</b>  | 133.64  | -1.90 | 0.33 | 5.76  | 8.20766E-09 | 1.85843E-06 |
| <b>CHST1</b>    | 20.40   | -1.93 | 0.48 | 4.06  | 4.92054E-05 | 0.002011045 |
| <b>SERPINB4</b> | 27.36   | -1.94 | 0.41 | 4.73  | 2.20374E-06 | 0.000204283 |
| <b>IGFBP3</b>   | 65.76   | -1.99 | 0.27 | 7.33  | 2.32726E-13 | 1.78579E-10 |
| <b>IL8</b>      | 89.90   | -2.03 | 0.27 | 7.45  | 9.42817E-14 | 8.68146E-11 |
| <b>C12orf68</b> | 31.95   | -2.03 | 0.42 | 4.82  | 1.4046E-06  | 0.000136622 |
| <b>CREB3L1</b>  | 17.96   | -2.31 | 0.49 | 4.74  | 2.11112E-06 | 0.000197019 |
| <b>CSF3</b>     | 340.13  | -2.49 | 0.23 | 10.91 | 1.04831E-27 | 1.44793E-23 |
| <b>KM-PA-2</b>  | 28.98   | -3.90 | 1.30 | 3.01  | 0.002654495 | 0.033822772 |

**Table S3. List of primer sequences for qPCR**

| <b>Primer</b> | <b>Sequence 5' - 3'</b> | <b>Gene</b>   |
|---------------|-------------------------|---------------|
| hgIL36g-F     | CTGGAGCCACGATTCAGTCC    | <i>IL36G</i>  |
| hgIL36G-R     | AGGGTCCACACTTGCTGATTC   | <i>IL36G</i>  |
| hgS100A9-F    | GCTGGAACGCAACATAGAGAC   | <i>S100A9</i> |
| hgS100A9-R    | TGCATTTGTGTCCAGGTCCTC   | <i>S100A9</i> |
| hgLCN2-F      | AGAGCTACAATGTCACCTCCG   | <i>LCN2</i>   |
| hgLCN2-R      | TTAATGTTGCCAGCGTGAAC    | <i>LCN2</i>   |
| hgDEFB4A-F    | CCAGCCATCAGCCATGAGGGT   | <i>DEFB4A</i> |
| hgDEFB4A-R    | GGAGCCCTTTCTGAATCCGCA   | <i>DEFB4A</i> |
| hgCXCL8-F     | AAGGTGCAGTTTTGCCAAGG    | <i>CXCL8</i>  |
| hgCXCL8-R     | CCCAGTTTTCTTGGGGTCC     | <i>CXCL8</i>  |
| hgCCL20-F     | TGTCAGTGCTGCTACTCCAC    | <i>CCL20</i>  |
| hgCCL20-R     | GATTTGCGCACACAGACAAC    | <i>CCL20</i>  |
| hgIL17C-F     | CCGGCTTCCCTTACCCTATC    | <i>IL17C</i>  |
| hgIL17C-R     | GGTACTTCCAAGGAGGTTGGG   | <i>IL17C</i>  |
| hgRPL37a-F    | AGATGAAGAGACGAGCTGTGG   | <i>RPL37A</i> |
| hgRPL37a-R    | CTTTACCGTGACAGCGGAAG    | <i>RPL37A</i> |
| hgCXCL5-F     | AGCGCGTTGCGTTTGTTTAC    | <i>CXCL5</i>  |
| hgCXCL5-R     | TGGCGAACACTTGCAGATTAC   | <i>CXCL5</i>  |
| hgNFKBIZ-F    | ACACCCACAAACCAACTCTGG   | <i>NFKBIZ</i> |
| hgNFKBIZ-R    | TGCTGAACACTGGAGGAAGTC   | <i>NFKBIZ</i> |

**Table S4. List of primer sequences for generation of luciferase constructs**

| <b><i>NFKB1Z</i><br/>reporter</b> | <b>Primer</b> | <b>Sequence 5` - 3`</b>         |
|-----------------------------------|---------------|---------------------------------|
| w/o STAT3                         | mutSTAT3-F    | GGCGCGCTCTTGCCAGTCCCCAAGAACCA   |
|                                   | mutSTAT3-R    | GACTGGCAAGAGCGCGCCCCGCACCCCTC   |
| w/o STAT1/3                       | mutSTAT1/3-F  | ATCCTGTACGGACGCATCCGGAGGAGGGGC  |
|                                   | mutSTAT1/3-R  | ATGCGTCCGTACAGGATGAGGCAATGCG    |
| w/o AP1                           | mutAP1-F      | CGCCTCCCTCTGCAGGCCCATCCCTCCAC   |
|                                   | mutAP1-R      | AGGGAGGCGGTGGAGGGAACCGGTTGGCC   |
| w/o KLF4                          | mutKLF4-F     | GGTCGGTCGCGCATTGCCTCATCCTGTAC   |
|                                   | mutKLF4-R     | GCAATGCGCGACCGACCGGTTGTTTGCCTG  |
| w/o NF-κB                         | mutNFκB-F     | CGCGCGCTGTAAGGGCAGGCAAACAACCGGT |
|                                   | mutNFκB-R     | GCCTGCCCTTACAGCGCGCGGCTTCCAGCCT |

## References

1. Nemajerova A, et al. (2016) TAp73 is a central transcriptional regulator of airway multiciliogenesis. *Genes Dev* 30(11):1300-1312.
2. Kim D, Langmead B, Salzberg SL (2015) HISAT: a fast spliced aligner with low memory requirements. *Nat Methods* 12(4):357-360.
3. Nair RP, et al. (2009) Genome-wide scan reveals association of psoriasis with IL-23 and NF-kappaB pathways. *Nat Genet* 41(2):199-204.
4. Swindell WR, et al. (2011) Genome-wide expression profiling of five mouse models identifies similarities and differences with human psoriasis. *Plos One* 6(4):e18266
5. Mahil SK, et al. (2017) An analysis of IL-36 signature genes and individuals with IL1RL2 knockout mutations validates IL-36 as a psoriasis therapeutic target. *Sci Transl Med* 9(411).
